# Supplementary material for: Comments and corrections on 3D modeling studies of locomotor muscle moment arms in archosaurs
Source: PeerJ. 2015 Oct 8;3:e1272. doi: 10.7717/peerj.1272 (PMC4614809; doi:10.7717/peerj.1272)
Supplement: Data S1 [file peerj-03-1272-s001.xlsx]

## Sheet: ABDADD
IN THIS SPREADSHEET ABDUCTION MOMENT ARMS ARE NEGATIVE, ADDUCTION MOMENT ARMS ARE POSITIVE. STANDARDISATION ACROSS MODELS REQUIRED REVERSING THE SIGN, WHICH IS DONE HEREIN ON NORMALISED MOMENT ARMS ONLY (WHEN NECESSARY).
NOTE THAT IN BATES & SCHACHNER (2012) AND BATES ET AL. (2013) ABDUCTION MOMENTS WERE NEGATIVE AND ADDUCTION MOMENT ARMS WERE POSITIVE (AS HEREIN), WHEREAS IN THE TWO STUDIES BY MAIDMENT ET AL. (2014A & B) ABDUCTION MOMENTS WERE POSITIVE AND ADDUCTION MOMENTS NEGATIVE).
OSTRICH
Femoral Length	0.26
Flex-Ext Angle		AMB	NormFL	Sign reversed		CFC	NormFL	Sign reversed		CFP	NormFL	Sign reversed		FCL	NormFL	Sign reversed		FCM	NormFL	Sign reversed		IC	NormFL	Sign reversed		IFI	NormFL	Sign reversed		Ila	NormFL	Sign reversed		ILFB	NormFL	Sign reversed		Ilp	NormFL	Sign reversed		ISF	NormFL	Sign reversed		ITCa	NormFL	Sign reversed
-15		-0.00259436	-0.00997832	0.00997832		-0.00571194	-0.021969			-0.00908713	-0.0349505			-0.0611892	-0.235343			-0.0771099	-0.296576			-0.0105236	-0.0404754			-0.00770618	-0.0296391			-0.0634793	-0.244151			-0.104161	-0.40062			-0.0884959	-0.340369			0.0234983	0.0903782			-0.0172979	-0.0665306
-30		0.0100499	0.0386536	-0.0386536		-0.0159151	-0.0612118			-0.0179273	-0.0689513			-0.0615354	-0.236675			-0.0742791	-0.285689			-0.0036188	-0.0139185			-0.00168438	-0.00647838			-0.068747	-0.264412			-0.0980177	-0.376991			-0.0891592	-0.34292			0.00373961	0.0143831			0.0047318	0.0181992
-45		0.0203498	0.0782685	-0.0782685		-0.0235587	-0.0906105			-0.0243773	-0.0937589			-0.0611438	-0.235168			-0.0716347	-0.275518			0.00520912	0.0200351			0.00498759	0.019183			-0.0722713	-0.277967			-0.0949879	-0.365338			-0.088666	-0.341023			-0.0134937	-0.051899			0.0284648	0.10948
-60		0.0210997	0.0811527	-0.0811527		-0.0291147	-0.11198			-0.0288937	-0.11113			-0.0605467	-0.232872			-0.0694914	-0.267274			0.0165236	0.0635523			0.0102579	0.0394535			-0.0746304	-0.28704			-0.0935586	-0.359841			-0.0878408	-0.337849			-0.0272218	-0.104699			0.047324	0.182015
-75		0.0150414	0.0578514	-0.0578514		-0.0328774	-0.126452			-0.0316902	-0.121885			-0.059617	-0.229296			-0.0676414	-0.260159			0.0317352	0.122059			0.0132752	0.0510583			-0.0755728	-0.290665			-0.0926204	-0.356232			-0.0862587	-0.331764			-0.0374099	-0.143884			0.0575843	0.221478
-85		0.0125332	0.0482045	-0.0482045		-0.0344039	-0.132323			-0.0325987	-0.12538			-0.0586273	-0.22549			-0.0667271	-0.256643			0.0431272	0.165874			0.0142873	0.0549512			-0.0754212	-0.290082			-0.0922245	-0.35471			-0.0850214	-0.327006			-0.0424404	-0.163232			0.0604547	0.232518
ALLIGATOR
Femoral length	0.137
Flex-Ext Angle		ADD1	NormFL	Sign reversed		ADD2	NormFL	Sign reversed		AMB	NormFL	Sign reversed		CFB	NormFL	Sign reversed		CFL	NormFL	Sign reversed		FTE	NormFL	Sign reversed		FTI1	NormFL	Sign reversed		FTI2	NormFL	Sign reversed		FTI3	NormFL	Sign reversed		FTI4	NormFL	Sign reversed		Ifa	NormFL	Sign reversed		Ifp	NormFL	Sign reversed
30		-0.0291281	-0.212614	0.212614		-0.0325232	-0.237396	0.237396		0.00586794	0.0428317	-0.0428317		-0.0142247	-0.10383	0.10383		-0.028656	-0.209168	0.209168		-0.00788168	-0.0575305	0.0575305		-0.0639947	-0.467115	0.467115		-0.0121001	-0.0883216	0.0883216		-0.020739	-0.15138	0.15138		-0.0351307	-0.256429	0.256429		0.0112893	0.0824037	-0.0824037		0.00627056	0.0457705	-0.0457705
15		-0.0328138	-0.239517	0.239517		-0.0321778	-0.234874	0.234874		0.00458639	0.0334773	-0.0334773		-0.0098183	-0.0716665	0.0716665		-0.0237161	-0.17311	0.17311		-0.000138734	-0.00101265	0.00101265		-0.0614886	-0.448822	0.448822		-0.00340974	-0.0248886	0.0248886		-0.0206557	-0.150771	0.150771		-0.0322662	-0.235519	0.235519		0.013717	0.100124	-0.100124		0.00995244	0.0726456	-0.0726456
0		-0.0331411	-0.241906	0.241906		-0.0295958	-0.216027	0.216027		0.00299709	0.0218765	-0.0218765		-0.00673847	-0.0491859	0.0491859		-0.0193704	-0.14139	0.14139		0.00402738	0.0293969	-0.0293969		-0.0539024	-0.393448	0.393448		0.00147128	0.0107393	-0.0107393		-0.019609	-0.143132	0.143132		-0.0285119	-0.208116	0.208116		0.0150374	0.109762	-0.109762		0.0125154	0.091353	-0.091353
-15		-0.0334684	-0.244295	0.244295		-0.0270137	-0.197181	0.197181		0.00140779	0.0102758	-0.0102758		-0.00365864	-0.0267054	0.0267054		-0.0150247	-0.109669	0.109669		0.00819349	0.0598065	-0.0598065		-0.0463163	-0.338075	0.338075		0.00635231	0.0463672	-0.0463672		-0.0185624	-0.135492	0.135492		-0.0247577	-0.180713	0.180713		0.0163577	0.1194	-0.1194		0.0150783	0.11006	-0.11006
-30		-0.0311833	-0.227615	0.227615		-0.0237134	-0.17309	0.17309		-0.000256604	-0.00187302	0.00187302		-0.00145054	-0.0105879	0.0105879		-0.0113537	-0.0828739	0.0828739		0.0101913	0.0743892	-0.0743892		-0.0387748	-0.283028	0.283028		0.00874653	0.0638433	-0.0638433		-0.0169929	-0.124036	0.124036		-0.0211423	-0.154324	0.154324		0.0166467	0.121509	-0.121509		0.0166079	0.121226	-0.121226
-45		-0.0284344	-0.207551	0.207551		-0.0206892	-0.151016	0.151016		-0.00191412	-0.0139717	0.0139717		0.000362304	0.00264455	-0.00264455		-0.008163	-0.059584	0.059584		0.0113605	0.0829234	-0.0829234		-0.0325584	-0.237653	0.237653		0.0101991	0.0744457	-0.0744457		-0.0154025	-0.112427	0.112427		-0.0179877	-0.131297	0.131297		0.0162624	0.118704	-0.118704		0.01754	0.12803	-0.12803
-60		-0.0256715	-0.187383	0.187383		-0.0181475	-0.132463	0.132463		-0.00262689	-0.0191744	0.0191744		0.0013534	0.00987882	-0.00987882		-0.00610963	-0.0445958	0.0445958		0.011616	0.0847885	-0.0847885		-0.0276534	-0.20185	0.20185		0.0106746	0.0779169	-0.0779169		-0.0140198	-0.102335	0.102335		-0.0155132	-0.113235	0.113235		0.0151086	0.110282	-0.110282		0.017762	0.129649	-0.129649
-75		-0.0234302	-0.171023	0.171023		-0.0160324	-0.117025	0.117025		-0.00356129	-0.0259948	0.0259948		0.00241093	0.017598	-0.017598		-0.00407885	-0.0297727	0.0297727		0.0118737	0.0866696	-0.0866696		-0.02372	-0.173139	0.173139		0.0111082	0.0810821	-0.0810821		-0.0126976	-0.092683	0.092683		-0.0132612	-0.096797	0.096797		0.0135965	0.0992447	-0.0992447		0.0177494	0.129557	-0.129557
POPOSAURUS
Femoral Length	0.352
Flex-Ext Angle		ADD1	NormFL	Sign reversed		ADD2	NormFL	Sign reversed		AMB	NormFL	Sign reversed		CFB	NormFL	Sign reversed		CFL	NormFL	Sign reversed		FTI	NormFL	Sign reversed		IFM	NormFL	Sign reversed		ILFB	NormFL	Sign reversed		ISTR	NormFL	Sign reversed		IT1	NormFL	Sign reversed		IT2	NormFL	Sign reversed		IT3	NormFL	Sign reversed
30		-0.0985513	-0.279975	0.279975		-0.11554	-0.328238	0.328238		0.00516085	0.0146615	-0.0146615		0.0120993	0.0343729	-0.0343729		-0.0139005	-0.03949	0.03949		-0.0418896	-0.119005	0.119005		0.0444111	0.126168	-0.126168		0.0243013	0.0690379	-0.0690379		-0.00719475	-0.0204396	0.0204396		0.0197212	0.0560261	-0.0560261		0.0447205	0.127047	-0.127047		0.048479	0.137725	-0.137725
15		-0.0786748	-0.223508	0.223508		-0.0732491	-0.208094	0.208094		0.000373454	0.00106095	-0.00106095		0.0134841	0.0383072	-0.0383072		-0.00742864	-0.0211041	0.0211041		-0.0370239	-0.105182	0.105182		0.0430403	0.122274	-0.122274		0.0347332	0.0986739	-0.0986739		-0.00199555	-0.00566917	0.00566917		0.0155833	0.0442709	-0.0442709		0.0490258	0.139278	-0.139278		0.053973	0.153332	-0.153332
0		-0.0610144	-0.173336	0.173336		-0.0542291	-0.15406	0.15406		-0.00527732	-0.0149924	0.0149924		0.0154534	0.0439017	-0.0439017		-0.00197614	-0.00561404	0.00561404		-0.0338796	-0.0962489	0.0962489		0.0363016	0.103129	-0.103129		0.0406041	0.115353	-0.115353		0.00338019	0.00960281	-0.00960281		0.0123058	0.0349596	-0.0349596		0.0497328	0.141286	-0.141286		0.0579353	0.164589	-0.164589
-15		-0.0433539	-0.123165	0.123165		-0.0352091	-0.100026	0.100026		-0.0109281	-0.0310457	0.0310457		0.0174227	0.0494963	-0.0494963		0.00347636	0.00987601	-0.00987601		-0.0307353	-0.0873162	0.0873162		0.0295628	0.0839853	-0.0839853		0.0464751	0.132031	-0.132031		0.00875593	0.0248748	-0.0248748		0.0090282	0.0256483	-0.0256483		0.0504397	0.143295	-0.143295		0.0618976	0.175845	-0.175845
-30		-0.0306005	-0.0869334	0.0869334		-0.021794	-0.0619148	0.0619148		-0.0172536	-0.049016	0.049016		0.0185807	0.052786	-0.052786		0.00844718	0.0239977	-0.0239977		-0.0260101	-0.0738925	0.0738925		0.01937	0.0550284	-0.0550284		0.0467776	0.132891	-0.132891		0.0110641	0.0314322	-0.0314322		0.00187868	0.00533717	-0.00533717		0.0448899	0.127528	-0.127528		0.0637544	0.18112	-0.18112
-45		-0.0212423	-0.0603474	0.0603474		-0.0120497	-0.034232	0.034232		-0.0215448	-0.0612068	0.0612068		0.0183137	0.0520276	-0.0520276		0.0112789	0.0320424	-0.0320424		-0.0218508	-0.0620761	0.0620761		0.00935286	0.0265706	-0.0265706		0.0439637	0.124897	-0.124897		0.0117213	0.033299	-0.033299		-0.0067844	-0.0192739	0.0192739		0.0357298	0.101505	-0.101505		0.0635522	0.180546	-0.180546
-60		-0.0136177	-0.0386866	0.0386866		-0.00356665	-0.0101325	0.0101325		-0.0260981	-0.0741423	0.0741423		0.0188826	0.0536438	-0.0536438		0.0147896	0.042016	-0.042016		-0.0169713	-0.048214	0.048214		-0.000758106	-0.00215371	0.00215371		0.0391979	0.111358	-0.111358		0.0116486	0.0330925	-0.0330925		-0.017646	-0.0501307	0.0501307		0.0242552	0.0689067	-0.0689067		0.0631103	0.179291	-0.179291
ALLOSAURUS
Femoral Length	0.7425
Flex-Ext Angle		ADD1	NormFL	Sign reversed		ADD2	NormFL	Sign reversed		AMB	NormFL	Sign reversed		CFB	NormFL	Sign reversed		CFL	NormFL	Sign reversed		FTE	NormFL	Sign reversed		FTI1	NormFL	Sign reversed		FTI3	NormFL	Sign reversed		IFE	NormFL	Sign reversed		ILFB	NormFL	Sign reversed		ISTR	NormFL	Sign reversed		IT1	NormFL	Sign reversed
30		-0.166175	-0.223804	0.223804		-0.155404	-0.209298	0.209298		0.0556262	0.0749174	-0.0749174		-0.0917763	-0.123604	0.123604		-0.10257	-0.138141	0.138141		0.0327127	0.0440575	-0.0440575		-0.190691	-0.256823	0.256823		-0.0618655	-0.0833206	0.0833206		0.103212	0.139006	-0.139006		-0.023787	-0.0320364	0.0320364		-0.138808	-0.186946	0.186946		0.0344138	0.0463486	-0.0463486
15		-0.192255	-0.258929	0.258929		-0.154686	-0.208331	0.208331		0.0404573	0.0544879	-0.0544879		-0.0448765	-0.0604397	0.0604397		-0.0704441	-0.0948742	0.0948742		0.0369513	0.0497661	-0.0497661		-0.20319	-0.273656	0.273656		-0.0588988	-0.0793249	0.0793249		0.114739	0.15453	-0.15453		0.00700072	0.00942858	-0.00942858		-0.117045	-0.157637	0.157637		0.0377433	0.0508328	-0.0508328
0		-0.176047	-0.2371	0.2371		-0.130818	-0.176186	0.176186		0.00985302	0.0132701	-0.0132701		-0.0125064	-0.0168436	0.0168436		-0.0399284	-0.0537756	0.0537756		0.0442671	0.059619	-0.059619		-0.183844	-0.247601	0.247601		-0.0522571	-0.07038	0.07038		0.123802	0.166737	-0.166737		0.0271486	0.0365638	-0.0365638		-0.0855365	-0.115201	0.115201		0.0342388	0.0461129	-0.0461129
-15		-0.159838	-0.21527	0.21527		-0.106951	-0.144042	0.144042		-0.0207512	-0.0279478	0.0279478		0.0198638	0.0267526	-0.0267526		-0.00941269	-0.012677	0.012677		0.0515829	0.0694719	-0.0694719		-0.164498	-0.221546	0.221546		-0.0456155	-0.061435	0.061435		0.132866	0.178944	-0.178944		0.0472965	0.063699	-0.063699		-0.0540279	-0.0727648	0.0727648		0.0307343	0.041393	-0.041393
-30		-0.121437	-0.163551	0.163551		-0.0774547	-0.104316	0.104316		-0.0727668	-0.0980024	0.0980024		0.0413176	0.0556466	-0.0556466		0.0155462	0.0209376	-0.0209376		0.0579474	0.0780437	-0.0780437		-0.14035	-0.189024	0.189024		-0.0394478	-0.0531284	0.0531284		0.138832	0.186979	-0.186979		0.0608112	0.0819006	-0.0819006		-0.0233313	-0.0314226	0.0314226		0.0260109	0.0350315	-0.0350315
-45		-0.0874966	-0.117841	0.117841		-0.0510626	-0.0687712	0.0687712		-0.120606	-0.162433	0.162433		0.0579457	0.0780414	-0.0780414		0.0361325	0.0486633	-0.0486633		0.0628202	0.0846063	-0.0846063		-0.114528	-0.154247	0.154247		-0.0334054	-0.0449904	0.0449904		0.142303	0.191654	-0.191654		0.0681399	0.0917709	-0.0917709		0.00228961	0.00308365	-0.00308365		0.0162066	0.021827	-0.021827
-60		-0.0603211	-0.0812405	0.0812405		-0.0287655	-0.0387414	0.0387414		-0.134628	-0.181317	0.181317		0.07065	0.0951516	-0.0951516		0.0535435	0.0721125	-0.0721125		0.0681878	0.0918355	-0.0918355		-0.0926637	-0.1248	0.1248		-0.0273122	-0.0367841	0.0367841		0.142624	0.192087	-0.192087		0.0722739	0.0973386	-0.0973386		0.0229813	0.0309513	-0.0309513		0.00389672	0.00524811	-0.00524811
-75		-0.0399453	-0.0537984	0.0537984		-0.0119163	-0.0160489	0.0160489		-0.122927	-0.165558	0.165558		0.0783016	0.105457	-0.105457		0.0640619	0.0862787	-0.0862787		0.0689536	0.0928668	-0.0928668		-0.0742211	-0.0999611	0.0999611		-0.0234932	-0.0316406	0.0316406		0.14029	0.188943	-0.188943		0.0694112	0.0934831	-0.0934831		0.0369243	0.0497297	-0.0497297		-0.0131018	-0.0176455	0.0176455
STRUTHIOMIMUS
Femoral Length	0.632
Flex-Ext Angle		ADD1	NormFL	Sign reversed		ADD2	NormFL	Sign reversed		AMB	NormFL	Sign reversed		CFB	NormFL	Sign reversed		CFL	NormFL	Sign reversed		FTE	NormFL	Sign reversed		FTI1	NormFL	Sign reversed		FTI3	NormFL	Sign reversed		IFE	NormFL	Sign reversed		ILFB	NormFL	Sign reversed		ISTR	NormFL	Sign reversed		IT1	NormFL	Sign reversed
30		-0.0697933	-0.110432	0.110432		-0.0652695	-0.103275	0.103275		0.0311507	0.049289	-0.049289		-0.0477237	-0.0755121	0.0755121		-0.0953901	-0.150934	0.150934		0.0278058	0.0439965	-0.0439965		-0.112508	-0.178019	0.178019		-0.0748573	-0.118445	0.118445		0.0547414	0.0866161	-0.0866161		-0.0155567	-0.024615	0.024615		-0.0694039	-0.109816	0.109816		0.0333814	0.0528187	-0.0528187
15		-0.080747	-0.127764	0.127764		-0.064968	-0.102797	0.102797		0.0226561	0.0358482	-0.0358482		-0.0233358	-0.0369237	0.0369237		-0.065513	-0.10366	0.10366		0.0314086	0.0496972	-0.0496972		-0.119882	-0.189687	0.189687		-0.0712675	-0.112765	0.112765		0.0623456	0.0986481	-0.0986481		0.00457847	0.00724442	-0.00724442		-0.0585226	-0.0925991	0.0925991		0.036611	0.0579289	-0.0579289
0		-0.0739395	-0.116993	0.116993		-0.0549437	-0.0869362	0.0869362		0.00551769	0.00873052	-0.00873052		-0.00650331	-0.01029	0.01029		-0.0371334	-0.0587554	0.0587554		0.037627	0.0595365	-0.0595365		-0.108468	-0.171626	0.171626		-0.0632311	-0.100049	0.100049		0.0681589	0.107846	-0.107846		0.0177552	0.0280937	-0.0280937		-0.0427683	-0.0676713	0.0676713		0.0332117	0.0525501	-0.0525501
-15		-0.0671321	-0.106222	0.106222		-0.0449194	-0.071075	0.071075		-0.0116207	-0.0183872	0.0183872		0.0103292	0.0163436	-0.0163436		-0.0087538	-0.013851	0.013851		0.0438455	0.0693758	-0.0693758		-0.0970536	-0.153566	0.153566		-0.0551948	-0.0873335	0.0873335		0.0739721	0.117045	-0.117045		0.0309319	0.0489429	-0.0489429		-0.0270139	-0.0427436	0.0427436		0.0298123	0.0471714	-0.0471714
-30		-0.0510034	-0.0807015	0.0807015		-0.032531	-0.0514731	0.0514731		-0.0407494	-0.0644769	0.0644769		0.0214852	0.0339955	-0.0339955		0.0144579	0.0228765	-0.0228765		0.0492553	0.0779356	-0.0779356		-0.0828067	-0.131023	0.131023		-0.0477319	-0.0755251	0.0755251		0.07772	0.122975	-0.122975		0.0397705	0.062928	-0.062928		-0.0116657	-0.0184583	0.0184583		0.0252305	0.0399217	-0.0399217
-45		-0.0367486	-0.0581465	0.0581465		-0.0214463	-0.033934	0.033934		-0.0675396	-0.106866	0.106866		0.0301318	0.0476769	-0.0476769		0.0336032	0.0531696	-0.0531696		0.0533971	0.0844891	-0.0844891		-0.0675717	-0.106917	0.106917		-0.0404205	-0.0639565	0.0639565		0.0799215	0.126458	-0.126458		0.0445635	0.0705119	-0.0705119		0.00114481	0.0018114	-0.0018114		0.0157204	0.024874	-0.024874
-60		-0.0287655	-0.045515	0.045515		-0.0287655	-0.045515	0.045515		-0.0753916	-0.119291	0.119291		0.036738	0.0581298	-0.0581298		0.0497955	0.0787903	-0.0787903		0.0579597	0.0917083	-0.0917083		-0.0546716	-0.0865057	0.0865057		-0.0330478	-0.0522908	0.0522908		0.0801931	0.126888	-0.126888		0.0472671	0.0747898	-0.0747898		0.0114907	0.0181814	-0.0181814		0.00377982	0.00598073	-0.00598073
-75		-0.0119163	-0.0188549	0.0188549		-0.0119163	-0.0188549	0.0188549		-0.068839	-0.108922	0.108922		0.0407169	0.0644254	-0.0644254		0.0595776	0.0942683	-0.0942683		0.0586105	0.0927382	-0.0927382		-0.0437905	-0.0692887	0.0692887		-0.0284267	-0.044979	0.044979		0.0790196	0.125031	-0.125031		0.0453949	0.0718274	-0.0718274		0.0184622	0.0292123	-0.0292123		-0.0127087	-0.0201087	0.0201087
LESOTHOSAURUS
Femoral Length	0.103
Flex-Ext Angle		ADD1	NormFL	Sign reversed		ADD2	NormFL	Sign reversed		AMB	NormFL	Sign reversed		CFB	NormFL	Sign reversed		CFL	NormFL	Sign reversed		FTE	NormFL	Sign reversed		FTI3	NormFL	Sign reversed		IFMa	NormFL	Sign reversed		IFMp	NormFL	Sign reversed		ILFB	NormFL	Sign reversed		ISTR	NormFL	Sign reversed		ITBa	NormFL	Sign reversed
30		-0.0469234	-0.455567	0.455567		-0.027068	-0.262796	0.262796		0.00285454	0.0277139	-0.0277139		0.00210916	0.0204773	-0.0204773		-0.00830188	-0.0806008	0.0806008		0.0093054	0.0903437	-0.0903437		-0.00295643	-0.0287032	0.0287032		0.0122161	0.118603	-0.118603		0.0119188	0.115716	-0.115716		-0.00183506	-0.0178161	0.0178161		-0.0174838	-0.169745	0.169745		0.00941822	0.091439	-0.091439
15		-0.0327133	-0.317605	0.317605		-0.0221694	-0.215237	0.215237		0.00250889	0.0243581	-0.0243581		0.00461355	0.0447918	-0.0447918		-0.00517771	-0.050269	0.050269		0.00954601	0.0926797	-0.0926797		-0.00281648	-0.0273445	0.0273445		0.0128399	0.124659	-0.124659		0.0133376	0.129491	-0.129491		0.00151348	0.014694	-0.014694		-0.0142657	-0.138501	0.138501		0.00954278	0.0926484	-0.0926484
0		-0.0227174	-0.220557	0.220557		-0.0172689	-0.16766	0.16766		0.0020359	0.019766	-0.019766		0.00654113	0.0635061	-0.0635061		-0.00275561	-0.0267535	0.0267535		0.00987064	0.0958314	-0.0958314		-0.00242046	-0.0234996	0.0234996		0.0126544	0.122858	-0.122858		0.0146692	0.14242	-0.14242		0.00396984	0.0385422	-0.0385422		-0.0107309	-0.104183	0.104183		0.00935325	0.0908083	-0.0908083
-15		-0.0143723	-0.139537	0.139537		-0.0121768	-0.118221	0.118221		0.00146784	0.0142508	-0.0142508		0.0084687	0.0822204	-0.0822204		-0.000476898	-0.00463008	0.00463008		0.0101397	0.0984436	-0.0984436		-0.00188138	-0.0182658	0.0182658		0.0114223	0.110896	-0.110896		0.0160183	0.155518	-0.155518		0.00607065	0.0589384	-0.0589384		-0.00622141	-0.060402	0.060402		0.00903777	0.0877454	-0.0877454
-30		-0.00898192	-0.0872031	0.0872031		-0.00842056	-0.081753	0.081753		0.000925554	0.00898596	-0.00898596		0.0098209	0.0953485	-0.0953485		0.0011426	0.0110932	-0.0110932		0.0103459	0.100446	-0.100446		-0.00140541	-0.0136448	0.0136448		0.00929847	0.0902764	-0.0902764		0.0169962	0.165011	-0.165011		0.00744342	0.0722662	-0.0722662		-0.0022585	-0.0219272	0.0219272		0.00874823	0.0849343	-0.0849343
-45		-0.00496365	-0.0481908	0.0481908		-0.00543488	-0.0527658	0.0527658		0.0005961	0.00578738	-0.00578738		0.0108023	0.104877	-0.104877		0.00221932	0.0215468	-0.0215468		0.0103623	0.100605	-0.100605		-0.000974206	-0.00945831	0.00945831		0.00618489	0.0600474	-0.0600474		0.0177553	0.172382	-0.172382		0.00834732	0.0810419	-0.0810419		0.00117905	0.0114471	-0.0114471		0.00850483	0.0825711	-0.0825711
-60		-0.00184543	-0.0179168	0.0179168		-0.00301279	-0.0292504	0.0292504		0.000107738	0.001046	-0.001046		0.0115516	0.112152	-0.112152		0.00307683	0.0298722	-0.0298722		0.0105101	0.10204	-0.10204		-0.000552058	-0.00535978	0.00535978		0.00223804	0.0217285	-0.0217285		0.0182068	0.176765	-0.176765		0.00901074	0.087483	-0.087483		0.00405809	0.039399	-0.039399		0.00816874	0.0793081	-0.0793081
-75		0.000559967	0.00543657	-0.00543657		-0.00111618	-0.0108367	0.0108367		-0.000125099	-0.00121455	0.00121455		0.0119422	0.115944	-0.115944		0.0034768	0.0337553	-0.0337553		0.0104882	0.101827	-0.101827		-0.000192723	-0.0018711	0.0018711		-0.00227775	-0.0221141	0.0221141		0.0183618	0.17827	-0.17827		0.00931559	0.0904427	-0.0904427		0.00623823	0.0605653	-0.0605653		0.00782251	0.0759467	-0.0759467
EDMONTOSAURUS
Femoral Length	1.05
Flex-Ext Angle		ADD1	NormFL	Sign reversed		ADD2	NormFL	Sign reversed		AMB	NormFL	Sign reversed		CFB	NormFL	Sign reversed		CFL	NormFL	Sign reversed		FTE	NormFL	Sign reversed		FTI3	NormFL	Sign reversed		IFMa	NormFL	Sign reversed		IFMp	NormFL	Sign reversed		ILFB	NormFL	Sign reversed		ISTR	NormFL	Sign reversed		ITBa	NormFL	Sign reversed
30		0.501151	0.477287			0.268008	0.255245			-0.0869925	-0.08285			0.0200627	0.0191073			0.175251	0.166906			-0.060708	-0.0578172			0.00349576	0.0033293			-0.13045	-0.124238			-0.145282	-0.138364			-0.0806986	-0.0768558			0.14501	0.138105			-0.211731	-0.201648
15		0.341618	0.325351			0.195945	0.186615			-0.0677073	-0.0644832			-0.0161794	-0.015409			0.111569	0.106256			-0.0906071	-0.0862924			-0.00515862	-0.00491297			-0.135797	-0.12933			-0.160708	-0.153056			-0.11393	-0.108505			0.13278	0.126457			-0.212586	-0.202463
0		0.216153	0.20586			0.124368	0.118446			-0.0433428	-0.0412788			-0.0409351	-0.0389858			0.0569159	0.0542056			-0.114708	-0.109246			-0.0171448	-0.0163284			-0.13112	-0.124876			-0.166385	-0.158462			-0.142875	-0.136071			0.108217	0.103064			-0.205578	-0.195789
-15		0.116932	0.111364			0.0596231	0.0567839			-0.019233	-0.0183171			-0.0656909	-0.0625627			0.014309	0.0136276			-0.130133	-0.123937			-0.0314037	-0.0299083			-0.114168	-0.108732			-0.162192	-0.154468			-0.164564	-0.156728			0.0719824	0.0685546			-0.191062	-0.181963
-30		0.0451846	0.0430329			0.00999496	0.00951901			0.00859896	0.00818948			-0.082187	-0.0782733			-0.0198257	-0.0188816			-0.142966	-0.136158			-0.0440607	-0.0419625			-0.0850371	-0.0809877			-0.148668	-0.141589			-0.183061	-0.174343			0.0253764	0.024168			-0.172231	-0.164029
-45		-0.0121907	-0.0116102			-0.0310484	-0.0295699			0.0310864	0.0296061			-0.0906978	-0.0863789			-0.0434732	-0.041403			-0.146354	-0.139385			-0.0548725	-0.0522595			-0.0405997	-0.0386664			-0.121018	-0.115256			-0.191544	-0.182423			-0.026221	-0.0249723			-0.1436	-0.136762
-60		-0.0531902	-0.0506573			-0.0595643	-0.0567279			0.0464978	0.0442837			-0.0895989	-0.0853323			-0.0574509	-0.0547151			-0.137056	-0.13053			-0.0599768	-0.0571208			0.0120314	0.0114584			-0.076828	-0.0731695			-0.183573	-0.174832			-0.0690686	-0.0657796			-0.0978074	-0.0931499
-75		-0.0941755	-0.089691			-0.0918214	-0.087449			0.0579608	0.0552008			-0.0987189	-0.094018			-0.0742196	-0.0706854			-0.145382	-0.138459			-0.0733661	-0.0698724			0.0675251	0.0643096			-0.03885	-0.037			-0.200688	-0.191131			-0.114611	-0.109153			-0.0509299	-0.0485047
HYPSILOPHODON
Femoral Length	0.173
Flex-Ext Angle		ADD1	NormFL	Sign reversed		ADD2	NormFL	Sign reversed		AMB	NormFL	Sign reversed		CFB	NormFL	Sign reversed		CFL	NormFL	Sign reversed		FTE	NormFL	Sign reversed		FTI3	NormFL	Sign reversed		IFMa	NormFL	Sign reversed		IFMp	NormFL	Sign reversed		ILFB	NormFL	Sign reversed		ISTR	NormFL	Sign reversed		ITBa	NormFL	Sign reversed
30		0.0700774	0.405071			0.0494293	0.285719			0.00292748	0.0169218			0.00767855	0.0443847			0.00436035	0.0252043			-0.00655269	-0.0378768			0.00661566	0.0382408			-0.0101115	-0.0584481			0	0			-0.00896405	-0.0518153			0.00954405	0.0551679			-0.0161499	-0.0933519
15		0.059928	0.346405			0.0417649	0.241416			0.0040678	0.0235133			0.00471536	0.0272564			0.00273402	0.0158036			-0.00784977	-0.0453744			0.00634725	0.0366893			-0.0109423	-0.0632503			-0.00657616	-0.0380125			-0.0103914	-0.060066			0.0090276	0.0521826			-0.0161392	-0.0932899
0		0.0449555	0.259859			0.0310785	0.179645			0.00549972	0.0317903			0.00267928	0.0154872			0.00134249	0.00776008			-0.00894681	-0.0517156			0.00582048	0.0336444			-0.0116171	-0.067151			-0.00822961	-0.04757			-0.0116253	-0.0671982			0.00782587	0.0452362			-0.0159839	-0.0923928
-15		0.0325113	0.187926			0.0220263	0.127319			0.00717247	0.0414594			0.000643203	0.00371793			0.000166834	0.00096436			-0.00991995	-0.0573407			0.00523516	0.030261			-0.0120276	-0.0695235			-0.0100268	-0.0579582			-0.0127058	-0.073444			0.00593403	0.0343008			-0.0158539	-0.0916408
-30		0.0229255	0.132518			0.0147783	0.0854236			0.00895027	0.0517357			-0.000650225	-0.00375853			-0.000709559	-0.0041015			-0.0105364	-0.060904			0.00454044	0.0262453			-0.0121117	-0.0700098			-0.0115774	-0.0669215			-0.0134301	-0.0776306			0.00354221	0.0204752			-0.0156476	-0.0904486
-45		0.0157341	0.0909485			0.00919861	0.0531711			0.0106085	0.061321			-0.00149073	-0.00861696			-0.00127424	-0.00736557			-0.0107991	-0.0624227			0.00387679	0.0224092			-0.0119162	-0.06888			-0.0126136	-0.072911			-0.0137892	-0.0797065			0.000874764	0.00505644			-0.0154979	-0.0895832
-60		0.0103679	0.0599298			0.0049498	0.0286116			0.0121473	0.0702155			-0.00206846	-0.0119564			-0.00170355	-0.00984712			-0.0110057	-0.0636166			0.00331524	0.0191632			-0.0117219	-0.0677565			-0.0129785	-0.0750203			-0.0140445	-0.081182			-0.00179864	-0.0103967			-0.0154358	-0.0892243
-75		0.00677553	0.0391649			0.00209674	0.0121199			0.0119962	0.0693424			-0.00165318	-0.00955598			-0.00116781	-0.00675037			-0.00985239	-0.0569502			0.00309466	0.0178882			-0.0122548	-0.0708373			-0.0124555	-0.0719973			-0.0130735	-0.0755693			-0.00405809	-0.0234572			-0.0160004	-0.092488
CHASMOSAURUS
Femoral Length	0.885
Flex-Ext Angle		ADD1	NormFL	Sign reversed		ADD2	NormFL	Sign reversed		AMB	NormFL	Sign reversed		CFB	NormFL	Sign reversed		CFL	NormFL	Sign reversed		FTE	NormFL	Sign reversed		FTI3	NormFL	Sign reversed		IFMa	NormFL	Sign reversed		IFMp	NormFL	Sign reversed		ILFB	NormFL	Sign reversed		ISTR	NormFL	Sign reversed		ITBa	NormFL	Sign reversed
30		0.190885	0.215689			0.148948	0.168303			-0.0126399	-0.0142823			-0.0146366	-0.0165385			-0.0020257	-0.00228893			-0.0378868	-0.0428099			-0.0320701	-0.0362374			-0.0933847	-0.105519			-0.0866069	-0.0978609			-0.0451775	-0.051048			0.055192	0.0623639			-0.0921567	-0.104132
15		0.123995	0.140107			0.0936129	0.105777			-0.0102364	-0.0115666			-0.0199648	-0.0225591			-0.0112935	-0.012761			-0.0423329	-0.0478338			-0.0327296	-0.0369826			-0.0814199	-0.0919999			-0.0789699	-0.0892315			-0.053217	-0.0601323			0.0356793	0.0403156			-0.0922868	-0.104279
0		0.0789649	0.0892259			0.0566365	0.0639961			-0.00755821	-0.00854035			-0.0245304	-0.027718			-0.0177682	-0.020077			-0.0461141	-0.0521063			-0.0330704	-0.0373676			-0.0626352	-0.0707743			-0.0654645	-0.0739712			-0.0599752	-0.0677686			0.0147228	0.0166359			-0.0928818	-0.104951
-15		0.0438207	0.0495149			0.0273727	0.0309296			-0.00535606	-0.00605204			-0.029096	-0.0328768			-0.0243943	-0.0275642			-0.0494073	-0.0558274			-0.0337204	-0.0381022			-0.0352977	-0.0398844			-0.0436396	-0.0493103			-0.0658184	-0.0743711			-0.00639779	-0.00722915			-0.0934871	-0.105635
-30		0.0210709	0.0238089			0.00820946	0.00927622			-0.00379394	-0.00428694			-0.0326074	-0.0368445			-0.0291264	-0.0329112			-0.0513253	-0.0579947			-0.0339434	-0.0383542			0.00102054	0.00115316			-0.0109616	-0.012386			-0.0693863	-0.0784026			-0.0225344	-0.0254626			-0.0943877	-0.106653
-45		-0.00167897	-0.00189715			-0.0109538	-0.0123772			-0.00223183	-0.00252184			-0.0361188	-0.0408122			-0.0338585	-0.0382582			-0.0532434	-0.060162			-0.0341664	-0.0386062			0.0373387	0.0421907			0.0217163	0.0245382			-0.0729543	-0.0824342			-0.0386711	-0.0436961			-0.0952882	-0.10767
-60		-0.01699	-0.0191978			-0.0238988	-0.0270043			-0.00168773	-0.00190704			-0.0387915	-0.0438322			-0.0374493	-0.0423156			-0.0542723	-0.0613247			-0.0343253	-0.0387856			0.0558612	0.06312			0.047008	0.0531164			-0.0748617	-0.0845895			-0.0491571	-0.0555448			-0.0966136	-0.109168
-75		-0.0283913	-0.0320805			-0.0334288	-0.0377727			-0.00248454	-0.00280739			-0.0408255	-0.0461305			-0.040254	-0.0454847			-0.0543319	-0.0613919			-0.0342712	-0.0387245			0.0647232	0.0731335			0.0599936	0.0677894			-0.075455	-0.0852599			-0.0559857	-0.0632606			-0.0984853	-0.111283
SCELIDOSAURUS
Femoral Length	0.113
Flex-Ext Angle		ADD1	NormFL	Sign reversed		ADD2	NormFL	Sign reversed		AMB	NormFL	Sign reversed		CFB	NormFL	Sign reversed		CFL	NormFL	Sign reversed		FTE	NormFL	Sign reversed		FTI3	NormFL	Sign reversed		IFMa	NormFL	Sign reversed		IFMp	NormFL	Sign reversed		ILFB	NormFL	Sign reversed		ISTR	NormFL	Sign reversed		ITBa	NormFL	Sign reversed
30		0.0723908	0.640626			0.0547245	0.484287			-0.00266605	-0.0235933			0.0090164	0.0797911			0.00555002	0.0491153			-0.0105234	-0.0931279			0.00608767	0.0538732			-0.0168177	-0.14883			-0.0158789	-0.140521			-0.0164385	-0.145474			0.0242075	0.214226			-0.0177173	-0.15679
15		0.0540319	0.478159			0.0382119	0.338158			-0.00142901	-0.0126461			0.00475996	0.0421235			0.00162321	0.0143647			-0.0110521	-0.0978058			0.00493023	0.0436304			-0.0170567	-0.150944			-0.0164007	-0.145139			-0.0166437	-0.147289			0.0194246	0.171899			-0.0167882	-0.148568
0		0.0399439	0.353486			0.0276371	0.244576			0.000192657	0.00170492			0.00205918	0.0182229			-0.00122008	-0.0107971			-0.0121036	-0.107112			0.00443859	0.0392796			-0.017732	-0.15692			-0.0169225	-0.149757			-0.0178415	-0.157889			0.0150871	0.133514			-0.0170777	-0.15113
-15		0.0273204	0.241773			0.018346	0.162354			0.0016989	0.0150345			-0.000641593	-0.00567781			-0.00348862	-0.0308727			-0.0126165	-0.11165			0.003433	0.0303805			-0.0181891	-0.160965			-0.0184635	-0.163393			-0.0183044	-0.161986			0.00986476	0.0872988			-0.0166961	-0.147754
-30		0.0180036	0.159323			0.0113761	0.100673			0.00312181	0.0276266			-0.0024821	-0.0219655			-0.00518478	-0.045883			-0.0129424	-0.114535			0.00247706	0.0219208			-0.0186462	-0.16501			-0.0192337	-0.17021			-0.018574	-0.164372			0.00499113	0.0441693			-0.0163839	-0.14499
-45		0.0107736	0.0953413			0.00597417	0.0528687			0.00377593	0.0334153			-0.00356113	-0.0315144			-0.00605554	-0.0535888			-0.0125516	-0.111076			0.00163687	0.0144856			-0.0191033	-0.169056			-0.018488	-0.16361			-0.0180206	-0.159475			0.000822732	0.00728081			-0.0160031	-0.141621
-60		0.00582615	0.0515588			0.00202216	0.0178952			0.00499334	0.0441888			-0.00472867	-0.0418467			-0.00734042	-0.0649595			-0.0133563	-0.118198			0.000943731	0.0083516			-0.0195604	-0.173101			-0.0190098	-0.168228			-0.018963	-0.167814			-0.00272605	-0.0241243			-0.0164525	-0.145597
-75		0.001799	0.0159204			-0.00101785	-0.00900752			0.00445383	0.0394144			-0.00499317	-0.0441873			-0.00753892	-0.0667161			-0.0130086	-0.11512			0.000387384	0.00342818			-0.0200175	-0.177146			-0.0195316	-0.172846			-0.0185425	-0.164093			-0.00535552	-0.047394			-0.0169659	-0.150141
KENTROSAURUS
Femoral Length	0.641
Flex-Ext Angle		ADD1	NormFL	Sign reversed		ADD2	NormFL	Sign reversed		AMB	NormFL	Sign reversed		CFB	NormFL	Sign reversed		CFL	NormFL	Sign reversed		FTE	NormFL	Sign reversed		FTI3	NormFL	Sign reversed		IFMa	NormFL	Sign reversed		IFMp	NormFL	Sign reversed		ILFB	NormFL	Sign reversed		ISTR	NormFL	Sign reversed		ITBa	NormFL	Sign reversed
30		-0.227577	-0.355034	0.355034		-0.203152	-0.31693	0.31693		0.108823	0.16977	-0.16977		0.0336525	0.0525	-0.0525		-0.0708954	-0.110601	0.110601		0.124404	0.194078	-0.194078		0.0370646	0.0578231	-0.0578231		0.123598	0.192821	-0.192821		0.144366	0.22522	-0.22522		0.133265	0.207901	-0.207901		-0.115206	-0.179729	0.179729		0.165772	0.258615	-0.258615
15		-0.186397	-0.290792	0.290792		-0.146946	-0.229245	0.229245		0.111049	0.173244	-0.173244		0.0478384	0.0746309	-0.0746309		-0.0437148	-0.0681978	0.0681978		0.123243	0.192267	-0.192267		0.0390001	0.0608426	-0.0608426		0.127967	0.199637	-0.199637		0.160577	0.250511	-0.250511		0.133165	0.207746	-0.207746		-0.0884825	-0.138038	0.138038		0.167532	0.261361	-0.261361
0		-0.141092	-0.220113	0.220113		-0.0985147	-0.153689	0.153689		0.11451	0.178643	-0.178643		0.0588624	0.091829	-0.091829		-0.0185001	-0.0288613	0.0288613		0.122957	0.191821	-0.191821		0.0410997	0.0641181	-0.0641181		0.126447	0.197266	-0.197266		0.169929	0.2651	-0.2651		0.134115	0.209228	-0.209228		-0.0570496	-0.0890009	0.0890009		0.169873	0.265012	-0.265012
-15		-0.100438	-0.15669	0.15669		-0.0592238	-0.0923928	0.0923928		0.118672	0.185136	-0.185136		0.0698864	0.109027	-0.109027		0.00378763	0.00590895	-0.00590895		0.123033	0.191939	-0.191939		0.0430943	0.0672297	-0.0672297		0.117683	0.183593	-0.183593		0.170402	0.265838	-0.265838		0.134987	0.210588	-0.210588		-0.0236921	-0.0369612	0.0369612		0.172702	0.269427	-0.269427
-30		-0.0661086	-0.103133	0.103133		-0.0274493	-0.0428227	0.0428227		0.124183	0.193734	-0.193734		0.0779121	0.121548	-0.121548		0.0223471	0.0348628	-0.0348628		0.123067	0.191993	-0.191993		0.0449349	0.0701012	-0.0701012		0.100418	0.156659	-0.156659		0.160402	0.250237	-0.250237		0.135251	0.210999	-0.210999		0.00884862	0.0138044	-0.0138044		0.176295	0.275031	-0.275031
-45		-0.0386395	-0.06028	0.06028		-0.00220283	-0.00343656	0.00343656		0.130251	0.203199	-0.203199		0.084809	0.132307	-0.132307		0.0373331	0.058242	-0.058242		0.124087	0.193583	-0.193583		0.0468032	0.0730159	-0.0730159		0.0739164	0.115314	-0.115314		0.13933	0.217364	-0.217364		0.135866	0.211959	-0.211959		0.0389445	0.0607559	-0.0607559		0.182795	0.285171	-0.285171
-60		-0.0164234	-0.0256216	0.0256216		0.0169165	0.0263908	-0.0263908		0.13217	0.206194	-0.206194		0.086979	0.135693	-0.135693		0.0461812	0.0720456	-0.0720456		0.120666	0.188247	-0.188247		0.0466461	0.0727708	-0.0727708		0.0351849	0.0548907	-0.0548907		0.102014	0.159148	-0.159148		0.131373	0.20495	-0.20495		0.06338	0.0988768	-0.0988768		0.186254	0.290568	-0.290568
-75		0.00202412	0.00315776	-0.00315776		0.0335972	0.0524137	-0.0524137		0.12567	0.196054	-0.196054		0.0910501	0.142044	-0.142044		0.0552807	0.0862413	-0.0862413		0.122694	0.19141	-0.19141		0.0487872	0.0761111	-0.0761111		-0.0153132	-0.0238896	0.0238896		0.04843	0.0755539	-0.0755539		0.130326	0.203317	-0.203317		0.0846641	0.132081	-0.132081		0.192846	0.300851	-0.300851
STEGOCERAS
Femoral Length	0.23
Flex-Ext Angle		ADD1	NormFL	Sign reversed		ADD2	NormFL	Sign reversed		AMB	NormFL	Sign reversed		CFB	NormFL	Sign reversed		CFL	NormFL	Sign reversed		FTE	NormFL	Sign reversed		FTI3	NormFL	Sign reversed		IFMa	NormFL	Sign reversed		IFMp	NormFL	Sign reversed		ILFB	NormFL	Sign reversed		ISTR	NormFL	Sign reversed		ITBa	NormFL	Sign reversed
30		0.0933526	0.405881			0.087746	0.381504	-0.381504		-0.00233975	-0.0101728			-0.00573575	-0.024938			0.0292088	0.126995			-0.0384189	-0.167039			0.0150743	0.0655402			-0.024158	-0.105035			-0.00833174	-0.0362249			-0.0411376	-0.178859			0.0180398	0.0784341			-0.0321924	-0.139967
15		0.072072	0.313356			0.0696268	0.302725	-0.302725		-0.000998818	-0.00434269			-0.0119003	-0.0517402			0.0190827	0.0829681			-0.0381064	-0.16568			0.013899	0.0604304			-0.0266208	-0.115743			-0.014501	-0.0630476			-0.0417447	-0.181499			0.0138465	0.0602022			-0.0319166	-0.138768
0		0.0539158	0.234417			0.05387	0.234217	-0.234217		0.000739406	0.00321481			-0.0166059	-0.0721994			0.0104952	0.0456313			-0.0381427	-0.165838			0.0126405	0.0549588			-0.0278905	-0.121263			-0.0195443	-0.084975			-0.0423682	-0.18421			0.00915963	0.0398245			-0.0313684	-0.136384
-15		0.0398466	0.173246			0.0411353	0.178849	-0.178849		0.00278211	0.0120961			-0.0213115	-0.0926585			0.00321874	0.0139945			-0.0385711	-0.167701			0.0113763	0.0494624			-0.0275346	-0.119716			-0.0238227	-0.103577			-0.0431309	-0.187526			0.00433227	0.0188359			-0.0307921	-0.133879
-30		0.0284433	0.123667			0.0306713	0.133353	-0.133353		0.00514391	0.0223648			-0.0245927	-0.106925			-0.00247016	-0.0107398			-0.0388145	-0.168758			0.0102144	0.0444105			-0.0245325	-0.106663			-0.0268964	-0.116941			-0.0435358	-0.189286			-6.86008e-05	-0.000298264			-0.0298035	-0.12958
-45		0.0195193	0.0848666			0.0223599	0.097217	-0.097217		0.00757517	0.0329355			-0.0269716	-0.117268			-0.00673963	-0.0293028			-0.0389616	-0.169398			0.00923171	0.0401379			-0.0165921	-0.0721397			-0.0280152	-0.121805			-0.0437359	-0.190156			-0.00385006	-0.0167394			-0.0288056	-0.125242
-60		0.0126127	0.0548377			0.0159063	0.0691579	-0.0691579		0.0098327	0.0427509			-0.0283951	-0.123457			-0.00954888	-0.0415169			-0.0388585	-0.16895			0.00850297	0.0369694			-0.000472488	-0.00205429			-0.0265348	-0.115369			-0.0436244	-0.189671			-0.0067982	-0.0295574			-0.0279281	-0.121427
-75		0.00732228	0.031836			0.0109891	0.0477785	-0.0477785		0.011797	0.0512912			-0.0290893	-0.126475			-0.0111347	-0.0484118			-0.0388005	-0.168698			0.00801674	0.0348554			0.0067073	0.0291622			-0.0222681	-0.0968177			-0.0434803	-0.189045			-0.00888526	-0.0386316			-0.0271934	-0.118232
DYOPLOSAURUS
Femoral Length	0.535
Flex-Ext Angle		ADD1	NormFL	Sign reversed		ADD2	NormFL	Sign reversed		AMB	NormFL	Sign reversed		CFB	NormFL	Sign reversed		CFL	NormFL	Sign reversed		FTE	NormFL	Sign reversed		FTI3	NormFL	Sign reversed		IFMa	NormFL	Sign reversed		IFMp	NormFL	Sign reversed		ILFB	NormFL	Sign reversed		ISTR	NormFL	Sign reversed		ITBa	NormFL	Sign reversed
30		-0.192269	-0.35938	0.35938		-0.21088	-0.394169	0.394169		-0.00351745	-0.00657468	0.00657468		-0.0892399	-0.166803	0.166803		-0.122104	-0.228231	0.228231		-0.0907668	-0.169658	0.169658		0.000111196	0.000207842	-0.000207842		0.0618627	0.115631	-0.115631		0.0618627	0.115631	-0.115631		-0.0913832	-0.17081	0.17081		-0.0907248	-0.169579	0.169579		0.230232	0.430339	-0.430339
15		-0.181758	-0.339734	0.339734		-0.177538	-0.331847	0.331847		-0.00429074	-0.00802008	0.00802008		-0.0323742	-0.0605126	0.0605126		-0.0968254	-0.180982	0.180982		-0.00824656	-0.0154141	0.0154141		0.00856381	0.0160071	-0.0160071		0.12271	0.229364	-0.229364		0.12271	0.229364	-0.229364		0.00382783	0.00715482	-0.00715482		-0.0516307	-0.0965059	0.0965059		0.239238	0.447173	-0.447173
0		-0.171247	-0.320088	0.320088		-0.144196	-0.269525	0.269525		-0.00398564	-0.0074498	0.0074498		-0.0262476	-0.049061	0.049061		-0.071547	-0.133733	0.133733		-0.000293156	-0.000547954	0.000547954		0.0117877	0.022033	-0.022033		0.177835	0.332402	-0.332402		0.177835	0.332402	-0.332402		0.0185228	0.0346221	-0.0346221		-0.0442915	-0.0827879	0.0827879		0.248243	0.464006	-0.464006
-15		-0.131869	-0.246484	0.246484		-0.111786	-0.208945	0.208945		-0.00417886	-0.00781096	0.00781096		-0.020121	-0.0376094	0.0376094		-0.0605776	-0.113229	0.113229		0.00909908	0.0170076	-0.0170076		0.0144937	0.027091	-0.027091		0.190691	0.356431	-0.356431		0.190691	0.356431	-0.356431		0.0306851	0.0573554	-0.0573554		-0.021199	-0.0396243	0.0396243		0.247971	0.463497	-0.463497
-30		-0.0960703	-0.179571	0.179571		-0.083062	-0.155256	0.155256		-0.00387574	-0.00724437	0.00724437		-0.0130466	-0.0243862	0.0243862		-0.051147	-0.0956019	0.0956019		0.0158711	0.0296656	-0.0296656		0.0165666	0.0309656	-0.0309656		0.193804	0.362251	-0.362251		0.193804	0.362251	-0.362251		0.0389671	0.0728358	-0.0728358		0.000558098	0.00104317	-0.00104317		0.244795	0.457561	-0.457561
-45		-0.068251	-0.127572	0.127572		-0.0611056	-0.114216	0.114216		-0.00250365	-0.00467972	0.00467972		-0.00855303	-0.015987	0.015987		-0.0449795	-0.0840738	0.0840738		0.0207626	0.0388086	-0.0388086		0.0184057	0.0344033	-0.0344033		0.19339	0.361476	-0.361476		0.19339	0.361476	-0.361476		0.0449079	0.08394	-0.08394		0.0189846	0.0354852	-0.0354852		0.246983	0.461651	-0.461651
-60		-0.0366983	-0.068595	0.068595		-0.0350005	-0.0654215	0.0654215		-0.00031721	-0.000592917	0.000592917		-0.00496433	-0.00927913	0.00927913		-0.0329309	-0.061553	0.061553		0.0193625	0.0361916	-0.0361916		0.0160751	0.0300469	-0.0300469		0.149505	0.279448	-0.279448		0.149505	0.279448	-0.279448		0.0390474	0.0729858	-0.0729858		0.0269753	0.0504211	-0.0504211		0.201117	0.375919	-0.375919
-75		-0.0271448	-0.050738	0.050738		-0.0293847	-0.0549246	0.0549246		0.00153754	0.00287391	-0.00287391		-0.00567177	-0.0106014	0.0106014		-0.0383369	-0.0716577	0.0716577		0.0245567	0.0459004	-0.0459004		0.0199651	0.037318	-0.037318		0.16855	0.315047	-0.315047		0.16855	0.315047	-0.315047		0.0480554	0.0898232	-0.0898232		0.04326	0.0808599	-0.0808599		0.251582	0.470246	-0.470246
[truncated: 33 more columns]

## Sheet: LAR
IN THIS SPREADSHEET MEDIAL LONG AXIS ROTATION MOMENT ARMS ARE NEGATIVE, LATERAL LONG AXIS ROTATION MOMENT ARMS ARE POSITIVE. STANDARDISATION ACROSS MODELS REQUIRED REVERSING THE SIGN, WHICH IS DONE HEREIN ON NORMALISED MOMENT ARMS ONLY (WHEN NECESSARY).
OSTRICH
Femoral Length	0.26
Flex-Ext Angle		AMB	NormFL	Sign reversed		CFC	NormFL	Sign reversed		CFP	NormFL	Sign reversed		FCL	NormFL	Sign reversed		FCM	NormFL	Sign reversed		IC	NormFL	Sign reversed		IFI	NormFL	Sign reversed		Ila	NormFL	Sign reversed		ILFB	NormFL	Sign reversed		Ilp	NormFL	Sign reversed		ISF	NormFL	Sign reversed		ITCa	NormFL	Sign reversed
-15		0.028849	0.110958	-0.110958		-0.049791	-0.191504	0.191504		-0.044783	-0.172242	0.172242		-0.0256118	-0.0985069	0.0985069		-0.00277971	-0.0106912	0.0106912		0.0361021	0.138854	-0.138854		0.0356807	0.137233	-0.137233		-0.0141969	-0.0546035	0.0546035		-0.0330938	-0.127284	0.127284		-0.0500136	-0.19236	0.19236		-0.0398	-0.153077	0.153077		0.0936113	0.360043	-0.360043
-30		0.0197564	0.0759862	-0.0759862		-0.0442367	-0.170141	0.170141		-0.0388785	-0.149533	0.149533		-0.0208276	-0.0801061	0.0801061		-0.00851364	-0.0327448	0.0327448		0.0420577	0.16176	-0.16176		0.0378487	0.145572	-0.145572		-0.0063562	-0.0244469	0.0244469		-0.0365279	-0.140492	0.140492		-0.0406964	-0.156525	0.156525		-0.0399841	-0.153785	0.153785		0.10168	0.391076	-0.391076
-45		0.011823	0.0454731	-0.0454731		-0.0373591	-0.143689	0.143689		-0.0318402	-0.122462	0.122462		-0.0151228	-0.0581648	0.0581648		-0.0109373	-0.0420665	0.0420665		0.0469905	0.180733	-0.180733		0.0348078	0.133876	-0.133876		0.00148108	0.00569646	-0.00569646		-0.0348179	-0.133915	0.133915		-0.0305502	-0.117501	0.117501		-0.0370713	-0.142582	0.142582		0.0962635	0.370244	-0.370244
-60		0.00420395	0.016169	-0.016169		-0.0296268	-0.113949	0.113949		-0.024102	-0.0927002	0.0927002		-0.00882987	-0.033961	0.033961		-0.0109925	-0.0422789	0.0422789		0.0499931	0.192281	-0.192281		0.0276917	0.106507	-0.106507		0.00905485	0.0348263	-0.0348263		-0.030281	-0.116465	0.116465		-0.0198279	-0.0762613	0.0762613		-0.0320937	-0.123437	0.123437		0.0781711	0.300658	-0.300658
-75		-0.00640554	-0.0246367	0.0246367		-0.0212768	-0.0818337	0.0818337		-0.015902	-0.0611614	0.0611614		-0.0019268	-0.00741078	0.00741078		-0.00894453	-0.034402	0.034402		0.0494804	0.190309	-0.190309		0.0199337	0.076668	-0.076668		0.0166772	0.0641431	-0.0641431		-0.0233154	-0.0896745	0.0896745		-0.00850356	-0.032706	0.032706		-0.0258117	-0.0992757	0.0992757		0.0547763	0.210678	-0.210678
-85		-0.0103743	-0.0399013	0.0399013		-0.0155689	-0.0598805	0.0598805		-0.0103684	-0.0398786	0.0398786		0.00268215	0.010316	-0.010316		-0.00711353	-0.0273597	0.0273597		0.0444151	0.170827	-0.170827		0.0148357	0.0570605	-0.0570605		0.021193	0.0815117	-0.0815117		-0.0183068	-0.0704107	0.0704107		-0.000954245	-0.00367017	0.00367017		-0.0212042	-0.0815545	0.0815545		0.0390769	0.150296	-0.150296
ALLIGATOR
Femoral length	0.137
Flex-Ext Angle		ADD1	NormFL			ADD2	NormFL			AMB	NormFL			CFB	NormFL			CFL	NormFL			FTE	NormFL			FTI1	NormFL			FTI2	NormFL			FTI3	NormFL			FTI4	NormFL			Ifa	NormFL			Ifp	NormFL
30		-0.00457516	-0.0333953			-0.00102431	-0.00747671			-0.0024377	-0.0177935			0.0127269	0.0928968			0.0116224	0.084835			0.0354067	0.258443			0.0040874	0.0298351			0.0399652	0.291717			0.00140426	0.01025			0.00353075	0.0257719			0.0122195	0.0891935			0.019343	0.14119
15		-0.0027891	-0.0203584			0.00097619	0.00712547			-0.00241046	-0.0175946			0.0108501	0.0791977			0.0114843	0.0838272			0.0266019	0.194174			0.00795596	0.0580727			0.03105	0.226642			0.00200381	0.0146263			0.00446872	0.0326184			0.00785093	0.0573061			0.0162295	0.118463
0		-0.000787457	-0.00574786			0.00256054	0.0186901			-0.00223876	-0.0163413			0.00896115	0.0654098			0.010803	0.0788541			0.0185402	0.13533			0.0101836	0.074333			0.0221165	0.161434			0.00240707	0.0175699			0.00485524	0.0354397			0.00361013	0.0263513			0.0120128	0.0876848
-15		0.000928651	0.00677847			0.00346854	0.0253178			-0.0017025	-0.012427			0.00717994	0.0524084			0.00956021	0.0697825			0.0123527	0.0901658			0.010952	0.0799419			0.015268	0.111445			0.00259237	0.0189224			0.00483651	0.035303			-0.000821301	-0.0059949			0.00722602	0.0527447
-30		0.00229651	0.0167628			0.00397607	0.0290224			-0.00104319	-0.00761453			0.00538188	0.0392838			0.00806402	0.0588615			0.00690249	0.0503831			0.0109296	0.0797783			0.00934567	0.0682166			0.00261748	0.0191057			0.00457618	0.0334028			-0.00513651	-0.0374928			0.00260584	0.0190208
-45		0.00313969	0.0229174			0.00409339	0.0298788			-0.000302751	-0.00220986			0.00374724	0.0273521			0.00646208	0.0471684			0.00259671	0.0189541			0.010401	0.0759194			0.00474553	0.0346389			0.00250928	0.0183159			0.00417188	0.0304517			-0.00917604	-0.0669784			-0.00168938	-0.0123312
-60		0.00367172	0.0268009			0.00402086	0.0293494			0.000432966	0.00316034			0.00227778	0.0166262			0.00486979	0.0355459			-0.000698235	-0.00509661			0.00952163	0.0695009			0.00113718	0.00830056			0.00234484	0.0171157			0.00368256	0.02688			-0.0122608	-0.0894947			-0.00530702	-0.0387374
-75		0.00403888	0.0294809			0.00394096	0.0287662			0.00108258	0.00790206			0.00116355	0.0084931			0.00358607	0.0261757			-0.00296076	-0.0216114			0.00876758	0.0639969			-0.00134338	-0.00980572			0.00215251	0.0157118			0.00324009	0.0236503			-0.0148246	-0.108209			-0.00849707	-0.0620224
POPOSAURUS
Femoral Length	0.352
Flex-Ext Angle		ADD1	NormFL			ADD2	NormFL			AMB	NormFL			CFB	NormFL			CFL	NormFL			FTI	NormFL			IFM	NormFL			ILFB	NormFL			ISTR	NormFL			IT1	NormFL			IT2	NormFL			IT3	NormFL
30		0.0328304	0.0932681			0.0421115	0.119635			-0.017816	-0.0506137			0.0121847	0.0346156			0.0201222	0.0571653			0.00412871	0.0117293			0.00492859	0.0140017			0.0493727	0.140263			0.038331	0.108895			-0.0106011	-0.0301169			0.0227958	0.0647609			0.0328392	0.0932933
15		0.0370636	0.105294			0.0416597	0.118351			-0.0194301	-0.055199			0.00987444	0.0280524			0.0209645	0.0595583			0.00771319	0.0219125			-0.00839594	-0.0238521			0.0387285	0.110024			0.0431927	0.122707			-0.0159684	-0.0453647			0.0104498	0.029687			0.0264019	0.0750055
0		0.0349626	0.0993257			0.0384924	0.109353			-0.0191586	-0.0544278			0.0074018	0.0210278			0.0193884	0.0550806			0.0100858	0.0286529			-0.0184534	-0.0524243			0.0261903	0.0744043			0.0384603	0.109262			-0.0205356	-0.0583398			-0.00282489	-0.00802526			0.018691	0.0530994
-15		0.0328616	0.093357			0.0353251	0.100355			-0.0188871	-0.0536565			0.00492916	0.0140033			0.0178122	0.0506029			0.0124585	0.0353934			-0.0285108	-0.0809965			0.0136521	0.0387844			0.0337279	0.0958179			-0.0251029	-0.071315			-0.0160996	-0.0457375			0.01098	0.0311932
-30		0.0291491	0.0828098			0.0312174	0.0886859			-0.016321	-0.0463665			0.00234763	0.00666939			0.0145188	0.0412465			0.0136065	0.0386548			-0.033952	-0.0964545			0.00144207	0.00409678			0.0257905	0.0732685			-0.0284271	-0.0807587			-0.0282859	-0.0803577			0.0025747	0.00731448
-45		0.0250431	0.0711452			0.0263944	0.0749841			-0.0118185	-0.0335752			-8.25076e-05	-0.000234397			0.0117958	0.0335109			0.0139938	0.0397552			-0.0361244	-0.102626			-0.00938052	-0.0266492			0.0188919	0.0536702			-0.0296739	-0.0843009			-0.0380168	-0.108002			-0.00488151	-0.0138679
-60		0.0216225	0.0614276			0.0221344	0.0628818			-0.00643046	-0.0182683			-0.00262065	-0.00744504			0.00840199	0.0238693			0.0139973	0.039765			-0.0369333	-0.104924			-0.0192878	-0.0547948			0.0138085	0.0392286			-0.0303131	-0.0861169			-0.0462102	-0.131279			-0.0131754	-0.0374302
ALLOSAURUS
Femoral Length	0.7425
Flex-Ext Angle		ADD1	NormFL			ADD2	NormFL			AMB	NormFL			CFB	NormFL			CFL	NormFL			FTE	NormFL			FTI1	NormFL			FTI3	NormFL			IFE	NormFL			ILFB	NormFL			ISTR	NormFL			IT1	NormFL
30		0.00367791	0.00495341			0.0288898	0.0389088			-0.0658946	-0.088747			0.119809	0.161359			0.0913454	0.123024			0.0527265	0.0710121			-0.0147503	-0.0198657			0.00807254	0.0108721			0.0988147	0.133084			0.124964	0.168301			-0.00539949	-0.00727204			0.0316001	0.042559
15		0.0309414	0.0416719			0.056066	0.0755098			-0.0874271	-0.117747			0.119034	0.160315			0.101356	0.136507			0.0522565	0.0703791			0.00193983	0.00261256			0.012249	0.016497			0.0835301	0.112498			0.108628	0.1463			0.00550663	0.00741633			0.0129891	0.0174937
0		0.0524657	0.0706609			0.0711767	0.0958608			-0.109263	-0.147156			0.109224	0.147103			0.100037	0.13473			0.0481129	0.0647985			0.0158146	0.0212992			0.0145235	0.0195603			0.0666119	0.089713			0.0898755	0.121044			0.0166765	0.0224599			-0.00601148	-0.00809627
-15		0.0739901	0.0996499			0.0862873	0.116212			-0.131099	-0.176565			0.0994144	0.133891			0.0987182	0.132954			0.0439693	0.0592179			0.0296894	0.0399858			0.016798	0.0226236			0.0496937	0.0669276			0.071123	0.0957886			0.0278463	0.0375034			-0.025012	-0.0336863
-30		0.0774519	0.104312			0.0871165	0.117329			-0.139935	-0.188465			0.0852936	0.114873			0.089205	0.120141			0.0375676	0.0505961			0.0363955	0.0490175			0.0171312	0.0230723			0.0308768	0.041585			0.0507914	0.0684059			0.0389561	0.0524661			-0.0420247	-0.056599
-45		0.0741942	0.0999249			0.0822983	0.110839			-0.1168	-0.157307			0.0697773	0.0939762			0.0880444	0.118578			0.0303791	0.0409146			0.0389667	0.0524804			0.0163511	0.0220217			0.0120816	0.0162716			0.0302238	0.0407054			0.0494684	0.0666241			-0.0558687	-0.075244
-60		0.0677807	0.0912871			0.0740179	0.0996875			-0.0662321	-0.0892015			0.052937	0.0712957			0.0596355	0.0803172			0.0223714	0.0301298			0.0386156	0.0520075			0.0146525	0.0197341			-0.00812428	-0.0109418			0.00964858	0.0129947			0.059706	0.0804121			-0.0657499	-0.0885521
-75		0.0599551	0.0807477			0.0638454	0.0859871			-0.0175562	-0.0236447			0.0355686	0.0479038			0.0409138	0.0551028			0.0140418	0.0189115			0.0359813	0.0484596			0.0121437	0.0163551			-0.0264395	-0.0356087			-0.0104838	-0.0141196			0.0674391	0.090827			-0.0709474	-0.0955521
STRUTHIOMIMUS
Femoral Length	0.632
Flex-Ext Angle		ADD1	NormFL			ADD2	NormFL			AMB	NormFL			CFB	NormFL			CFL	NormFL			FTE	NormFL			FTI1	NormFL			FTI3	NormFL			IFE	NormFL			ILFB	NormFL			ISTR	NormFL			IT1	NormFL
30		0.00268487	0.00424822			0.0118448	0.0187418			-0.0685304	-0.108434			0.0730836	0.115639			0.0913454	0.144534			0.048772	0.0771708			0.0105564	0.0167031			0.00403627	0.00638651			0.108696	0.171988			0.0740863	0.117225			-0.00809924	-0.0128153			-0.037104	-0.0587088
15		0.0235154	0.037208			0.0229871	0.036372			-0.0673189	-0.106517			0.0654687	0.10359			0.0983155	0.155563			0.0483373	0.076483			0.0197212	0.0312045			0.00673697	0.0106598			0.0918831	0.145385			0.0629878	0.0996642			0.0044053	0.00697041			-0.0558893	-0.0884324
0		0.0398739	0.0630917			0.0291824	0.0461747			-0.086318	-0.136579			0.0600733	0.0950527			0.0970361	0.153538			0.0445044	0.0704184			0.0257876	0.0408032			0.0094403	0.0149372			0.0732731	0.115938			0.0506988	0.0802196			0.0100059	0.0158321			-0.0718747	-0.113726
-15		0.0562324	0.0889754			0.0353778	0.0559775			-0.107502	-0.170097			0.0546779	0.0865157			0.0957567	0.151514			0.0406716	0.0643538			0.0318541	0.050402			0.0117586	0.0186054			0.0546631	0.0864922			0.0385939	0.0610663			0.0167078	0.0264364			-0.0819331	-0.129641
-30		0.0588635	0.0931384			0.0357178	0.0565154			-0.125942	-0.199275			0.0469115	0.074227			0.0856368	0.135501			0.0347501	0.0549843			0.0347893	0.0550463			0.0128484	0.0203297			0.0339645	0.0537413			0.0258646	0.040925			0.0253215	0.0400656			-0.101893	-0.161222
-45		0.0563876	0.0892209			0.0337423	0.0533897			-0.11096	-0.17557			0.0383775	0.0607239			0.0783595	0.123987			0.0281007	0.0444631			0.0357796	0.0566134			0.0130809	0.0206976			0.0132898	0.0210282			0.0134009	0.0212039			0.0346279	0.054791			-0.118301	-0.187185
-60		0.0515133	0.0815084			0.0303474	0.048018			-0.0635828	-0.100606			0.0322916	0.0510943			0.0596355	0.09436			0.0206935	0.0327429			0.0357885	0.0566273			0.011722	0.0185475			-0.00893671	-0.0141404			0.00149908	0.00237197			0.0477648	0.0755772			-0.129016	-0.204139
-75		0.0455659	0.072098			0.0261766	0.0414187			-0.0168539	-0.0266676			0.0216968	0.0343304			0.0409138	0.0647371			0.0129886	0.0205517			0.0361464	0.0571936			0.00971494	0.0153717			-0.0290834	-0.0460181			-0.00974128	-0.0154134			0.0606952	0.0960367			-0.130628	-0.20669
LESOTHOSAURUS
Femoral Length	0.103
Flex-Ext Angle		ADD1	NormFL			ADD2	NormFL			AMB	NormFL			CFB	NormFL			CFL	NormFL			FTE	NormFL			FTI3	NormFL			IFMa	NormFL			IFMp	NormFL			ILFB	NormFL			ISTR	NormFL			ITBa	NormFL
30		0.0105888	0.102804			0.00593303	0.0576022			-0.00184974	-0.0179587			0.0125204	0.121558			0.0099943	0.0970321			0.00327915	0.0318364			0.00090324	0.00876932			0.00121991	0.0118438			0.0141414	0.137295			0.0108362	0.105206			0.00988987	0.0960182			-0.000738994	-0.0071747
15		0.0135814	0.131858			0.00839459	0.0815009			-0.00204973	-0.0199003			0.011402	0.110699			0.00950712	0.0923021			0.003002	0.0291456			0.00123869	0.0120261			-0.00211544	-0.0205382			0.0127353	0.123644			0.0101776	0.0988119			0.0129786	0.126006			-0.00139587	-0.0135521
0		0.0140825	0.136724			0.00941872	0.0914439			-0.00212796	-0.0206598			0.00994113	0.0965158			0.00866602	0.0841361			0.0025078	0.0243476			0.00144957	0.0140734			-0.00535813	-0.0520207			0.0112212	0.108944			0.00899654	0.087345			0.0147115	0.14283			-0.00194336	-0.0188676
-15		0.013541	0.131466			0.0095992	0.0931961			-0.00203396	-0.0197472			0.00848029	0.0823329			0.00735466	0.0714045			0.00177195	0.0172034			0.0015809	0.0153485			-0.00925566	-0.0898607			0.00926745	0.0899752			0.00737635	0.071615			0.0153327	0.148861			-0.00247239	-0.0240038
-30		0.0125055	0.121413			0.00914337	0.0887706			-0.00173833	-0.016877			0.00677311	0.0657583			0.00593796	0.0576501			0.000981394	0.00952809			0.00158968	0.0154338			-0.0126464	-0.122781			0.00734447	0.0713056			0.00576531	0.0559739			0.01474	0.143107			-0.00280767	-0.0272589
-45		0.0111569	0.10832			0.00830788	0.0806591			-0.00123829	-0.0120222			0.00493499	0.0479126			0.00438445	0.0425675			9.57762e-05	0.000929866			0.00149326	0.0144976			-0.015503	-0.150514			0.00522796	0.0507569			0.00404086	0.0392317			0.0133337	0.129453			-0.0029724	-0.0288582
-60		0.00957408	0.0929522			0.0072007	0.0699097			-0.000536368	-0.00520745			0.00302259	0.0293455			0.00276462	0.026841			-0.000807959	-0.00784427			0.00132351	0.0128496			-0.0174587	-0.169502			0.0031527	0.0306087			0.00234331	0.0227506			0.0113	0.109709			-0.00286107	-0.0277773
-75		0.00779207	0.0756511			0.00588251	0.0571117			0.000268286	0.00260472			0.00105368	0.0102299			0.00111133	0.0107897			-0.00172553	-0.0167527			0.00108471	0.0105312			-0.0180729	-0.175465			0.00107347	0.0104221			0.000642666	0.00623948			0.00883659	0.0857922			-0.00241587	-0.023455
EDMONTOSAURUS
Femoral Length	1.05
Flex-Ext Angle		ADD1	NormFL	Sign reversed		ADD2	NormFL	Sign reversed		AMB	NormFL	Sign reversed		CFB	NormFL	Sign reversed		CFL	NormFL	Sign reversed		FTE	NormFL	Sign reversed		FTI3	NormFL	Sign reversed		IFMa	NormFL	Sign reversed		IFMp	NormFL	Sign reversed		ILFB	NormFL	Sign reversed		ISTR	NormFL	Sign reversed		ITBa	NormFL	Sign reversed
30		-0.171051	-0.162906	0.162906		-0.115378	-0.109884	0.109884		0.0864364	0.0823204	-0.0823204		-0.145719	-0.13878	0.13878		-0.186521	-0.177639	0.177639		-0.137525	-0.130976	0.130976		-0.0300303	-0.0286003	0.0286003		0.00911044	0.00867661	-0.00867661		-0.0713796	-0.0679806	0.0679806		-0.163471	-0.155687	0.155687		-0.0496079	-0.0472456	0.0472456		-0.0030402	-0.00289543	0.00289543
15		-0.226586	-0.215796	0.215796		-0.160263	-0.152631	0.152631		0.096969	0.0923514	-0.0923514		-0.12908	-0.122933	0.122933		-0.181127	-0.172502	0.172502		-0.119312	-0.113631	0.113631		-0.0408211	-0.0388772	0.0388772		0.0469233	0.0446889	-0.0446889		-0.0309966	-0.0295206	0.0295206		-0.150001	-0.142858	0.142858		-0.0904315	-0.0861253	0.0861253		0.0306334	0.0291746	-0.0291746
0		-0.237701	-0.226382	0.226382		-0.175819	-0.167446	0.167446		0.100093	0.0953263	-0.0953263		-0.108931	-0.103744	0.103744		-0.166513	-0.158583	0.158583		-0.0984063	-0.0937203	0.0937203		-0.0482461	-0.0459487	0.0459487		0.0867421	0.0826116	-0.0826116		0.0121607	0.0115816	-0.0115816		-0.130842	-0.124611	0.124611		-0.129381	-0.12322	0.12322		0.0597319	0.0568875	-0.0568875
-15		-0.234802	-0.223621	0.223621		-0.177677	-0.169216	0.169216		0.0980494	0.0933803	-0.0933803		-0.0887832	-0.0845554	0.0845554		-0.146864	-0.13987	0.13987		-0.0732562	-0.0697678	0.0697678		-0.0509345	-0.048509	0.048509		0.129809	0.123628	-0.123628		0.0558853	0.0532241	-0.0532241		-0.106454	-0.101385	0.101385		-0.16039	-0.152752	0.152752		0.0924016	0.0880015	-0.0880015
-30		-0.222521	-0.211924	0.211924		-0.170358	-0.162245	0.162245		0.0873148	0.0831569	-0.0831569		-0.0660228	-0.0628788	0.0628788		-0.123344	-0.117471	0.117471		-0.0457963	-0.0436155	0.0436155		-0.0495529	-0.0471932	0.0471932		0.171504	0.163338	-0.163338		0.0987773	0.0940736	-0.0940736		-0.0781877	-0.0744644	0.0744644		-0.180053	-0.171479	0.171479		0.126926	0.120881	-0.120881
-45		-0.200599	-0.191046	0.191046		-0.154596	-0.147234	0.147234		0.0636483	0.0606174	-0.0606174		-0.0423325	-0.0403166	0.0403166		-0.096731	-0.0921248	0.0921248		-0.0178273	-0.0169783	0.0169783		-0.0449921	-0.0428496	0.0428496		0.202382	0.192745	-0.192745		0.135944	0.12947	-0.12947		-0.0477102	-0.0454383	0.0454383		-0.182016	-0.173349	0.173349		0.156708	0.149246	-0.149246
-60		-0.172823	-0.164594	0.164594		-0.133495	-0.127138	0.127138		0.0284913	0.0271346	-0.0271346		-0.018323	-0.0174505	0.0174505		-0.0683908	-0.0651341	0.0651341		0.0101356	0.00965291	-0.00965291		-0.0377727	-0.035974	0.035974		0.214643	0.204422	-0.204422		0.159278	0.151693	-0.151693		-0.0160653	-0.0153003	0.0153003		-0.16527	-0.1574	0.1574		0.181557	0.172911	-0.172911
-75		-0.211499	-0.201428	0.201428		-0.163254	-0.15548	0.15548		-0.0200244	-0.0190709	0.0190709		0.00827973	0.00788546	-0.00788546		-0.0588916	-0.0560872	0.0560872		0.0562309	0.0535533	-0.0535533		-0.0433354	-0.0412718	0.0412718		0.305987	0.291416	-0.291416		0.240669	0.229209	-0.229209		0.023008	0.0219123	-0.0219123		-0.201433	-0.191841	0.191841		0.292317	0.278397	-0.278397
HYPSILOPHODON
Femoral Length	0.173
Flex-Ext Angle		ADD1	NormFL	Sign reversed		ADD2	NormFL	Sign reversed		AMB	NormFL	Sign reversed		CFB	NormFL	Sign reversed		CFL	NormFL	Sign reversed		FTE	NormFL	Sign reversed		FTI3	NormFL	Sign reversed		IFMa	NormFL	Sign reversed		IFMp	NormFL	Sign reversed		ILFB	NormFL	Sign reversed		ISTR	NormFL	Sign reversed		ITBa	NormFL	Sign reversed
30		-0.00526448	-0.0304305	0.0304305		-0.00456307	-0.0263761	0.0263761		0.0033835	0.0195578	-0.0195578		-0.00739906	-0.0427691	0.0427691		-0.00398418	-0.0230299	0.0230299		-0.00695369	-0.0401947	0.0401947		-0.000901442	-0.00521065	0.00521065		-0.00109435	-0.00632573	0.00632573		0	0	0		-0.0076189	-0.0440399	0.0440399		-0.00355676	-0.0205593	0.0205593		8.77236e-05	0.000507073	-0.000507073
15		-0.0132023	-0.0763139	0.0763139		-0.0112788	-0.0651951	0.0651951		0.00409758	0.0236854	-0.0236854		-0.00703345	-0.0406558	0.0406558		-0.00407307	-0.0235438	0.0235438		-0.00628979	-0.0363572	0.0363572		-0.00134879	-0.00779645	0.00779645		0.0011294	0.0065283	-0.0065283		-0.0102987	-0.05953	0.05953		-0.00711469	-0.0411254	0.0411254		-0.00627078	-0.0362473	0.0362473		0.000969609	0.00560468	-0.00560468
0		-0.016123	-0.0931966	0.0931966		-0.0140279	-0.0810862	0.0810862		0.00435303	0.025162	-0.025162		-0.00607963	-0.0351424	0.0351424		-0.00358167	-0.0207033	0.0207033		-0.00556855	-0.0321881	0.0321881		-0.0016908	-0.00977342	0.00977342		0.00408763	0.0236279	-0.0236279		-0.00735715	-0.0425269	0.0425269		-0.00632424	-0.0365563	0.0365563		-0.00849688	-0.0491149	0.0491149		0.00147584	0.00853088	-0.00853088
-15		-0.0169435	-0.0979391	0.0979391		-0.0149016	-0.0861361	0.0861361		0.00451933	0.0261233	-0.0261233		-0.00512582	-0.029629	0.029629		-0.00310469	-0.0179462	0.0179462		-0.00444332	-0.025684	0.025684		-0.00190661	-0.0110209	0.0110209		0.00702348	0.0405982	-0.0405982		-0.00502476	-0.0290449	0.0290449		-0.00509073	-0.0294262	0.0294262		-0.0104311	-0.0602957	0.0602957		0.00200677	0.0115998	-0.0115998
-30		-0.0165664	-0.0957598	0.0957598		-0.0146516	-0.0846913	0.0846913		0.00446193	0.0257915	-0.0257915		-0.00406418	-0.0234924	0.0234924		-0.0025588	-0.0147908	0.0147908		-0.00309848	-0.0179103	0.0179103		-0.00196715	-0.0113708	0.0113708		0.0100031	0.0578215	-0.0578215		-0.00248683	-0.0143748	0.0143748		-0.00357854	-0.0206852	0.0206852		-0.0117636	-0.0679977	0.0679977		0.0024863	0.0143717	-0.0143717
-45		-0.015332	-0.0886245	0.0886245		-0.0136118	-0.0786809	0.0786809		0.00397033	0.0229499	-0.0229499		-0.00288882	-0.0166984	0.0166984		-0.00183557	-0.0106102	0.0106102		-0.00187254	-0.0108239	0.0108239		-0.00197077	-0.0113917	0.0113917		0.0131752	0.0761571	-0.0761571		0.000597201	0.00345203	-0.00345203		-0.00212548	-0.012286	0.012286		-0.0121697	-0.0703452	0.0703452		0.0024989	0.0144445	-0.0144445
-60		-0.0137079	-0.0792366	0.0792366		-0.0121644	-0.0703143	0.0703143		0.00313424	0.018117	-0.018117		-0.00166656	-0.00963329	0.00963329		-0.00108985	-0.0062997	0.0062997		-0.000503587	-0.00291091	0.00291091		-0.00183576	-0.0106114	0.0106114		0.0149087	0.0861777	-0.0861777		0.00398437	0.023031	-0.023031		-0.000503946	-0.00291298	0.00291298		-0.011767	-0.0680176	0.0680176		0.00234748	0.0135692	-0.0135692
-75		-0.0116266	-0.0672056	0.0672056		-0.0102754	-0.0593951	0.0593951		0.00191466	0.0110674	-0.0110674		-0.00040833	-0.00236029	0.00236029		-0.000292414	-0.00169025	0.00169025		0.000856606	0.00495148	-0.00495148		-0.00159297	-0.00920792	0.00920792		0.0102628	0.0593228	-0.0593228		0.00751191	0.0434214	-0.0434214		0.00112653	0.00651173	-0.00651173		-0.0104758	-0.0605539	0.0605539		0.00184937	0.01069	-0.01069
CHASMOSAURUS
Femoral Length	0.885
Flex-Ext Angle		ADD1	NormFL	Sign reversed		ADD2	NormFL	Sign reversed		AMB	NormFL	Sign reversed		CFB	NormFL	Sign reversed		CFL	NormFL	Sign reversed		FTE	NormFL	Sign reversed		FTI3	NormFL	Sign reversed		IFMa	NormFL	Sign reversed		IFMp	NormFL	Sign reversed		ILFB	NormFL	Sign reversed		ISTR	NormFL	Sign reversed		ITBa	NormFL	Sign reversed
30		-0.0730177	-0.0825059	0.0825059		-0.0752013	-0.0849733	0.0849733		0.00939178	0.0106122	-0.0106122		-0.0388876	-0.0439408	0.0439408		-0.0460216	-0.0520019	0.0520019		-0.0360082	-0.0406873	0.0406873		-0.00603682	-0.00682127	0.00682127		0.0396021	0.0447481	-0.0447481		0.0271338	0.0306597	-0.0306597		-0.0508057	-0.0574076	0.0574076		-0.0603103	-0.0681472	0.0681472		-0.00158359	-0.00178936	0.00178936
15		-0.0847791	-0.0957955	0.0957955		-0.0816091	-0.0922137	0.0922137		0.00996623	0.0112613	-0.0112613		-0.0375445	-0.0424231	0.0424231		-0.0438592	-0.0495584	0.0495584		-0.0322485	-0.0364389	0.0364389		-0.00698404	-0.00789157	0.00789157		0.0649512	0.0733912	-0.0733912		0.0503805	0.0569271	-0.0569271		-0.0464476	-0.0524831	0.0524831		-0.0705729	-0.0797434	0.0797434		0.00226215	0.0025561	-0.0025561
0		-0.0866601	-0.097921	0.097921		-0.0813002	-0.0918646	0.0918646		0.0096015	0.0108491	-0.0108491		-0.0351282	-0.0396928	0.0396928		-0.0415314	-0.0469282	0.0469282		-0.0285517	-0.0322618	0.0322618		-0.00742484	-0.00838965	0.00838965		0.086913	0.0982068	-0.0982068		0.0721305	0.0815034	-0.0815034		-0.0415235	-0.0469192	0.0469192		-0.0748563	-0.0845834	0.0845834		0.00484635	0.0054761	-0.0054761
-15		-0.0821423	-0.0928161	0.0928161		-0.0759455	-0.0858141	0.0858141		0.0076299	0.00862135	-0.00862135		-0.0327119	-0.0369626	0.0369626		-0.0381421	-0.0430985	0.0430985		-0.0248705	-0.0281023	0.0281023		-0.0075778	-0.00856249	0.00856249		0.105692	0.119426	-0.119426		0.0918576	0.103794	-0.103794		-0.0360216	-0.0407023	0.0407023		-0.072281	-0.0816734	0.0816734		0.00510744	0.00577112	-0.00577112
-30		-0.0766357	-0.086594	0.086594		-0.0699263	-0.0790127	0.0790127		0.00556158	0.00628427	-0.00628427		-0.0289567	-0.0327195	0.0327195		-0.0344774	-0.0389575	0.0389575		-0.0188688	-0.0213207	0.0213207		-0.00656751	-0.00742091	0.00742091		0.112361	0.126962	-0.126962		0.10365	0.117119	-0.117119		-0.0276229	-0.0312124	0.0312124		-0.0649948	-0.0734405	0.0734405		0.00649421	0.00733809	-0.00733809
-45		-0.0676413	-0.0764308	0.0764308		-0.0609391	-0.0688577	0.0688577		0.00200188	0.00226201	-0.00226201		-0.0248411	-0.028069	0.028069		-0.0300034	-0.0339022	0.0339022		-0.0134934	-0.0152468	0.0152468		-0.00554335	-0.00626368	0.00626368		0.0944316	0.106702	-0.106702		0.0988164	0.111657	-0.111657		-0.019689	-0.0222475	0.0222475		-0.0540117	-0.0610301	0.0610301		0.00453304	0.00512208	-0.00512208
-60		-0.0575335	-0.0650096	0.0650096		-0.0509816	-0.0576063	0.0576063		-0.00181238	-0.00204789	0.00204789		-0.0201132	-0.0227268	0.0227268		-0.0250739	-0.028332	0.028332		-0.00724616	-0.00818776	0.00818776		-0.00396548	-0.00448077	0.00448077		0.0674169	0.0761773	-0.0761773		0.077678	0.0877717	-0.0877717		-0.0105459	-0.0119163	0.0119163		-0.0404983	-0.0457608	0.0457608		0.00201055	0.00227181	-0.00227181
-75		-0.0456497	-0.0515816	0.0515816		-0.0394997	-0.0446324	0.0446324		-0.00561244	-0.00634174	0.00634174		-0.0151303	-0.0170964	0.0170964		-0.019655	-0.022209	0.022209		-0.00115535	-0.00130548	0.00130548		-0.00231391	-0.00261458	0.00261458		0.0438443	0.0495416	-0.0495416		0.0536621	0.0606351	-0.0606351		-0.00158438	-0.00179026	0.00179026		-0.026028	-0.0294101	0.0294101		-0.00339329	-0.00383423	0.00383423
SCELIDOSAURUS
Femoral Length	0.113
Flex-Ext Angle		ADD1	NormFL	Sign reversed		ADD2	NormFL	Sign reversed		AMB	NormFL	Sign reversed		CFB	NormFL	Sign reversed		CFL	NormFL	Sign reversed		FTE	NormFL	Sign reversed		FTI3	NormFL	Sign reversed		IFMa	NormFL	Sign reversed		IFMp	NormFL	Sign reversed		ILFB	NormFL	Sign reversed		ISTR	NormFL	Sign reversed		ITBa	NormFL	Sign reversed
30		-0.00852191	-0.0754151	0.0754151		-0.0117108	-0.103635	0.103635		0.0047025	0.0416151	-0.0416151		-0.0117093	-0.103623	0.103623		-0.0119615	-0.105854	0.105854		-0.00584727	-0.0517457	0.0517457		-0.00180541	-0.0159771	0.0159771		-0.00107351	-0.00950012	0.00950012		-0.0171237	-0.151537	0.151537		-0.00618825	-0.0547633	0.0547633		-0.0105368	-0.0932461	0.0932461		0.00212221	0.0187806	-0.0187806
15		-0.0161164	-0.142623	0.142623		-0.0160458	-0.141998	0.141998		0.00500536	0.0442952	-0.0442952		-0.0108475	-0.0959959	0.0959959		-0.011055	-0.0978314	0.0978314		-0.00533204	-0.0471862	0.0471862		-0.00244729	-0.0216575	0.0216575		0.00349692	0.0309462	-0.0309462		-0.0120303	-0.106463	0.106463		-0.00565333	-0.0500295	0.0500295		-0.014169	-0.125389	0.125389		0.00317784	0.0281225	-0.0281225
0		-0.0191246	-0.169244	0.169244		-0.0174967	-0.154838	0.154838		0.00506462	0.0448197	-0.0448197		-0.00955444	-0.0845526	0.0845526		-0.00984465	-0.0871208	0.0871208		-0.00445504	-0.0394251	0.0394251		-0.0028711	-0.0254079	0.0254079		0.00914378	0.0809184	-0.0809184		-0.00693689	-0.0613884	0.0613884		-0.00466245	-0.0412606	0.0412606		-0.0164171	-0.145284	0.145284		0.00418445	0.0370305	-0.0370305
-15		-0.0196207	-0.173634	0.173634		-0.0173583	-0.153614	0.153614		0.00469617	0.041559	-0.041559		-0.00826135	-0.0731093	0.0731093		-0.00837127	-0.0740821	0.0740821		-0.00338862	-0.0299878	0.0299878		-0.00306407	-0.0271157	0.0271157		0.0142524	0.126128	-0.126128		-0.00232474	-0.0205729	0.0205729		-0.0034228	-0.0302903	0.0302903		-0.0171553	-0.151816	0.151816		0.00499186	0.0441758	-0.0441758
-30		-0.0188267	-0.166608	0.166608		-0.0163167	-0.144396	0.144396		0.0037975	0.0336062	-0.0336062		-0.00661073	-0.058502	0.058502		-0.00670052	-0.0592966	0.0592966		-0.00219118	-0.019391	0.019391		-0.0030376	-0.0268814	0.0268814		0.0193611	0.171337	-0.171337		0.00272893	0.0241498	-0.0241498		-0.00200826	-0.0177722	0.0177722		-0.0166465	-0.147315	0.147315		0.00551933	0.0488436	-0.0488436
-45		-0.0172575	-0.152721	0.152721		-0.0146813	-0.129923	0.129923		0.00233222	0.0206391	-0.0206391		-0.00481558	-0.0426158	0.0426158		-0.00489865	-0.0433509	0.0433509		-0.000929723	-0.00822764	0.00822764		-0.00282975	-0.0250421	0.0250421		0.0244697	0.216546	-0.216546		0.00834326	0.0738342	-0.0738342		-0.000505653	-0.00447481	0.00447481		-0.0151736	-0.13428	0.13428		0.00562587	0.0497865	-0.0497865
-60		-0.0152138	-0.134635	0.134635		-0.0126645	-0.112075	0.112075		0.000451381	0.00399452	-0.00399452		-0.00294133	-0.0260294	0.0260294		-0.00302893	-0.0268047	0.0268047		0.000351807	0.00311333	-0.00311333		-0.00248947	-0.0220307	0.0220307		0.0295784	0.261755	-0.261755		0.0134366	0.118908	-0.118908		0.00102392	0.00906126	-0.00906126		-0.0130389	-0.115389	0.115389		0.00512478	0.0453521	-0.0453521
-75		-0.103094	-0.912332	0.912332		-0.0833195	-0.737341	0.737341		-0.0120947	-0.107033	0.107033		-0.00828346	-0.0733049	0.0733049		-0.00894749	-0.0791813	0.0791813		0.013208	0.116885	-0.116885		-0.0163734	-0.144898	0.144898		0.034687	0.306965	-0.306965		0.01853	0.163983	-0.163983		0.0206442	0.182692	-0.182692		-0.0841583	-0.744764	0.744764		0.030702	0.271699	-0.271699
KENTROSAURUS
Femoral Length	0.641
Flex-Ext Angle		ADD1	NormFL			ADD2	NormFL			AMB	NormFL			CFB	NormFL			CFL	NormFL			FTE	NormFL			FTI3	NormFL			IFMa	NormFL			IFMp	NormFL			ILFB	NormFL			ISTR	NormFL			ITBa	NormFL
30		0.0441695	0.0689072			0.0791754	0.123519			-0.0113937	-0.0177748			0.0771173	0.120308			0.0830996	0.129641			0.0184255	0.028745			0.00739506	0.0115368			0.0256058	0.0399467			0.0855711	0.133496			0.0148477	0.0231634			0.0790526	0.123327			0.00916574	0.0142991
15		0.0718195	0.112043			0.0985478	0.153741			-0.0128124	-0.0199882			0.0723299	0.112839			0.0873013	0.136195			0.0193478	0.0301837			0.00922686	0.0143945			-0.00226173	-0.00352845			0.0524813	0.0818742			0.0184415	0.0287699			0.103346	0.161226			0.00400116	0.00624206
0		0.0862589	0.134569			0.104932	0.163701			-0.0127442	-0.0198817			0.0639737	0.099803			0.0854828	0.133358			0.0170335	0.0265734			0.00990163	0.0154472			-0.0327212	-0.0510471			0.0136103	0.0212328			0.0136905	0.021358			0.119223	0.185996			-0.000612345	-0.000955296
-15		0.090171	0.140672			0.102576	0.160025			-0.00934019	-0.0145713			0.0556175	0.0867668			0.0784546	0.122394			0.013331	0.0207971			0.00974787	0.0152073			-0.0631759	-0.0985583			-0.0260118	-0.04058			0.00687053	0.0107185			0.124847	0.19477			-0.00327733	-0.00511284
-30		0.0878091	0.136988			0.0954352	0.148885			-0.00276194	-0.0043088			0.0450565	0.070291			0.0678177	0.1058			0.0079539	0.0124086			0.00869503	0.0135648			-0.0938052	-0.146342			-0.0680237	-0.106121			-0.00289996	-0.00452411			0.121997	0.190322			-0.00437287	-0.00682195
-45		0.0811327	0.126572			0.0848666	0.132397			0.00734783	0.0114631			0.033433	0.0521576			0.0543793	0.0848352			0.00143109	0.00223258			0.006907	0.0107754			-0.122245	-0.190709			-0.10971	-0.171155			-0.0143408	-0.0223725			0.11154	0.174009			-0.00337692	-0.00526821
-60		0.0713095	0.111247			0.071692	0.111844			0.020011	0.0312183			0.0211763	0.0330364			0.0389042	0.0606929			-0.00569549	-0.00888532			0.00460324	0.00718135			-0.144404	-0.225279			-0.146133	-0.227977			-0.0263417	-0.0410946			0.0945765	0.147545			0.000533146	0.000831742
-75		0.059352	0.0925928			0.05672	0.0884868			0.0320425	0.0499882			0.00838237	0.013077			0.0221302	0.0345245			-0.0133694	-0.0208571			0.00186102	0.0029033			-0.154224	-0.240598			-0.172122	-0.268522			-0.0390033	-0.0608476			0.0728199	0.113604			0.00716868	0.0111836
STEGOCERAS
Femoral Length	0.23
Flex-Ext Angle		ADD1	NormFL	Sign reversed		ADD2	NormFL	Sign reversed		AMB	NormFL	Sign reversed		CFB	NormFL	Sign reversed		CFL	NormFL	Sign reversed		FTE	NormFL	Sign reversed		FTI3	NormFL	Sign reversed		IFMa	NormFL	Sign reversed		IFMp	NormFL	Sign reversed		ILFB	NormFL	Sign reversed		ISTR	NormFL	Sign reversed		ITBa	NormFL	Sign reversed
30		-0.0121194	-0.0526931	0.0526931		-0.0111302	-0.0483921	0.0483921		0.00500245	0.0217498	-0.0217498		-0.0303445	-0.131933	0.131933		-0.0273722	-0.11901	0.11901		-0.0113836	-0.0494938	0.0494938		-0.00338032	-0.0146971	0.0146971		-0.00949008	-0.0412612	0.0412612		-0.025286	-0.109939	0.109939		-0.0101693	-0.0442144	0.0442144		-0.0167858	-0.0729819	0.0729819		0.000545867	0.00237334	-0.00237334
15		-0.0192901	-0.0838698	0.0838698		-0.017017	-0.0739869	0.0739869		0.00633929	0.0275621	-0.0275621		-0.0276269	-0.120117	0.120117		-0.0269578	-0.117208	0.117208		-0.0108454	-0.047154	0.047154		-0.00372984	-0.0162167	0.0162167		-0.00303031	-0.0131753	0.0131753		-0.0209412	-0.0910486	0.0910486		-0.00944154	-0.0410502	0.0410502		-0.0192146	-0.0835419	0.0835419		0.00294306	0.0127959	-0.0127959
0		-0.0226701	-0.0985658	0.0985658		-0.0200085	-0.0869935	0.0869935		0.00746579	0.03246	-0.03246		-0.0238799	-0.103826	0.103826		-0.0251845	-0.109498	0.109498		-0.00950233	-0.0413145	0.0413145		-0.00385545	-0.0167628	0.0167628		0.00444505	0.0193263	-0.0193263		-0.0165749	-0.0720649	0.0720649		-0.0079207	-0.0344378	0.0344378		-0.0204475	-0.0889021	0.0889021		0.00525184	0.0228341	-0.0228341
-15		-0.0224326	-0.0975332	0.0975332		-0.0196081	-0.0852525	0.0852525		0.00789648	0.0343325	-0.0343325		-0.0201329	-0.0875343	0.0875343		-0.0213515	-0.0928325	0.0928325		-0.0081916	-0.0356156	0.0356156		-0.00376242	-0.0163584	0.0163584		0.0122464	0.053245	-0.053245		-0.0110816	-0.0481807	0.0481807		-0.00651654	-0.0283328	0.0283328		-0.0195185	-0.084863	0.084863		0.00639218	0.0277921	-0.0277921
-30		-0.0216923	-0.0943142	0.0943142		-0.0189065	-0.0822023	0.0822023		0.00816129	0.0354839	-0.0354839		-0.0158667	-0.0689858	0.0689858		-0.0175006	-0.0760895	0.0760895		-0.00606544	-0.0263715	0.0263715		-0.00349332	-0.0151883	0.0151883		0.0214346	0.093194	-0.093194		-0.00435325	-0.0189272	0.0189272		-0.00421715	-0.0183354	0.0183354		-0.0181826	-0.0790546	0.0790546		0.00772132	0.033571	-0.033571
-45		-0.0201909	-0.0877866	0.0877866		-0.017455	-0.0758913	0.0758913		0.00799498	0.0347608	-0.0347608		-0.0113646	-0.0494115	0.0494115		-0.0131773	-0.0572927	0.0572927		-0.00368843	-0.0160367	0.0160367		-0.00310418	-0.0134964	0.0134964		0.0298735	0.129885	-0.129885		0.00368474	0.0160206	-0.0160206		-0.00163117	-0.00709204	0.00709204		-0.0161539	-0.0702344	0.0702344		0.00861204	0.0374436	-0.0374436
-60		-0.0174876	-0.076033	0.076033		-0.0147943	-0.0643232	0.0643232		0.00706178	0.0307034	-0.0307034		-0.00646267	-0.0280986	0.0280986		-0.00804358	-0.0349721	0.0349721		-0.00119381	-0.00519049	0.00519049		-0.00256091	-0.0111344	0.0111344		0.0215035	0.0934936	-0.0934936		0.0122316	0.053181	-0.053181		0.00100754	0.0043806	-0.0043806		-0.0130771	-0.056857	0.056857		0.0082692	0.035953	-0.035953
-75		-0.0143474	-0.0623799	0.0623799		-0.0117735	-0.0511891	0.0511891		0.00554778	0.0241208	-0.0241208		-0.00123386	-0.0053646	0.0053646		-0.00269767	-0.011729	0.011729		0.00155403	0.00675665	-0.00675665		-0.00192428	-0.00836645	0.00836645		0.00913031	0.039697	-0.039697		0.0206192	0.0896486	-0.0896486		0.0039021	0.0169657	-0.0169657		-0.00966849	-0.0420369	0.0420369		0.00718544	0.031241	-0.031241
DYOPLOSAURUS
Femoral Length	0.535
Flex-Ext Angle		ADD1	NormFL			ADD2	NormFL			AMB	NormFL			CFB	NormFL			CFL	NormFL			FTE	NormFL			FTI3	NormFL			IFMa	NormFL			IFMp	NormFL			ILFB	NormFL			ISTR	NormFL			ITBa	NormFL
30		-0.0418268	-0.0781809			-0.0152487	-0.0285022			-0.00419259	-0.00783661			0.0421715	0.0788253			0.0219866	0.0410964			0.0690002	0.128972			0.00690466	0.0129059			0.164098	0.306725			0.164098	0.306725			0.0992123	0.185443			0.0298135	0.0557261			0.0722255	0.135001
15		0.0428269	0.0800503			0.0491771	0.0919199			-0.00290193	-0.00542416			0.0370946	0.0693358			0.0274136	0.0512404			0.0457781	0.0855665			0.0126572	0.0236583			0.107012	0.200022			0.107012	0.200022			0.0677873	0.126705			0.0831374	0.155397			0.0577781	0.107996
0		0.0604988	0.113082			0.0584018	0.109162			-0.00400913	-0.00749371			0.031807	0.0594523			0.0258194	0.0482606			0.0380578	0.071136			0.011166	0.020871			0.0763155	0.142646			0.0763155	0.142646			0.0556165	0.103956			0.0917457	0.171487			0.0510869	0.0954896
-15		0.0659225	0.12322			0.0585011	0.109348			-0.00205045	-0.00383262			0.0265194	0.0495689			0.0222786	0.0416423			0.0323028	0.0603791			0.0106314	0.0198717			0.0511797	0.095663			0.0511797	0.095663			0.0458218	0.0856482			0.0900425	0.168304			0.0468751	0.087617
-30		0.0671674	0.125546			0.0566301	0.105851			-0.0028979	-0.00541664			0.0202315	0.0378159			0.0183148	0.0342334			0.0249483	0.0466323			0.00851679	0.0159192			0.0183532	0.0343051			0.0183532	0.0343051			0.0340319	0.063611			0.0845563	0.158049			0.0409254	0.0764962
-45		0.0641918	0.119985			0.0518559	0.0969269			-0.00324322	-0.0060621			0.0136792	0.0255687			0.0137754	0.0257485			0.0179605	0.033571			0.00640205	0.0119665			-0.0130306	-0.0243562			-0.0130306	-0.0243562			0.0227603	0.0425426			0.0746604	0.139552			0.0362773	0.067808
-60		0.0593925	0.111014			0.0461172	0.0862004			-0.00725334	-0.0135576			0.00706321	0.0132023			0.0090483	0.0169127			0.010366	0.0193758			0.00353959	0.00661606			-0.0512372	-0.0957705			-0.0512372	-0.0957705			0.0108349	0.0202521			0.0624754	0.116776			0.0296857	0.0554872
-75		0.0512523	0.0957987			0.0377429	0.0705474			-0.0070554	-0.0131877			0.000271662	0.000507779			0.00382143	0.00714287			0.00329873	0.00616586			0.00101644	0.00189989			-0.0827404	-0.154655			-0.0827404	-0.154655			-0.000300036	-0.000560814			0.0472642	0.0883443			0.0252696	0.0472329
[truncated: 22 more columns]
